# Supplementary material for: A new criterion for determining the representative elementary volume of translucent porous media and inner contaminant
Source: Copernicus journal article supplement (doi:10.5194/hess-2020-91), 2020-05-20

**A new criterion for determining the representative elementary volume of  
translucent porous media and inner contaminant**

Ming Wu<sup>1,2</sup>, Jianfeng Wu<sup>2\*</sup>, Jichun Wu<sup>2</sup>, and Bill X. Hu<sup>1\*</sup>

<sup>1</sup> Institute of Groundwater and Earth Sciences, Jinan University, Guangzhou 510632,  
China

<sup>2</sup> Key Laboratory of Surficial Geochemistry, Ministry of Education; Department of  
Hydrosciences, School of Earth Sciences and Engineering, Nanjing University, Nanjing  
210023, China

*Correspondence to:* J.F. Wu ([jfwu@nju.edu.cn](mailto:jfwu@nju.edu.cn)), B.X. Hu ([billhu@jnu.edu.cn](mailto:billhu@jnu.edu.cn))

## ABSTRACT

Representative elementary volume (REV) is essential to measure and quantify the effective parameters of a complex heterogeneous medium. To overcome the limitations of the existing REV estimation criteria Since previous REV estimation criteria having multiple limitations, a new REV estimation criterion ( $\chi^i$ ) based on dimensionless range and gradient calculation is proposed in this study to estimate REV of a translucent material based on light transmission techniques. ~~Two~~ Three sandbox experiments are performed to estimate REVs of porosity, density, tortuosity and perchloroethylene (PCE) plume using multiple REV estimation criteria. In comparison with  $\chi^i$ , previous REV estimation criteria based on the coefficient of variation ( $C_V^i$ ), the entropy dimension ( $DI^i$ ) and the relative gradient error ( $\epsilon_g^i$ ) are tested in REV quantification of translucent silica and inner PCE plume to achieve their corresponding effects. Results suggest that new criterion ( $\chi^i$ ) can effectively identify the REV in the materials, whereas the coefficient of variation ( $C_V^i$ ) and entropy dimension ( $DI^i$ ) ~~cannot~~ are not effective. The relative gradient error ( $\epsilon_g^i$ ) can make the REV plateau obvious, while random fluctuations make the REV plateau uneasy to identify accurately. Therefore, the new criterion is appropriate for REV estimation for the translucent materials and inner contaminant. Models are built based on Gaussian equation to simulate the distribution of REV for media properties, which frequency of REV is dense in the middle and sparse on both sides. REV estimation of PCE plume indicates high level of porosity lead to large value of mean and standard deviation for REV of PCE saturation ( $S_o$ ) and PCE-water interfacial area ( $A_{ow}$ ). Fitted equations are derived for distribution of REV for PCE plume related to  $d_m$  (distances from mass center to considered point) and  $d_l$

(distances from injection position to considered point). Moreover, relationships between REV's of PCE plume and  $S_o$  are fitted using regression analysis. Results suggest a decreasing trend appears for  $S_o$ -REV when  $S_o$  increases, while  $A_{ow}$ -REV increases with increasing of  $S_o$ .

**Keywords:** new criterion; representative elementary volume (REV); translucent material

## 1. Introduction

Modelling groundwater and contaminant (such as hazardous ions) transport in subsurface environment is based on the premise that micro-structure of aquifer exist a representative elementary volume (REV) (Wang et al., 2016; Lei and Shi, 2019). REV acts as a micro-scale characteristic, which is important to improve our understanding of materials, inner fluid flow and other processes (Brown and Hsieh, 2000; Costanza-Robinson et al., 2011; Wu et al., 2017). Previous studies suggested that even the Platinum-Nanoparticle-Catalyzed hydrogenation reactions and ion transport through angstrom-scale slits in cell activity existed apparent size effect, implying size effect is a wide characteristic for many process and materials (Bai et al., 2016; Esfandiar et al., 2017). With the help of REV, a porous medium can be treated as continuum medium (Brown and Hsieh, 2000; Kang et al., 2003; Müller and Siegesmund, 2010; Teruel and Rizwan-uddin, 2010; Hendrick et al., 2012; Wang et al., 2012; Ukrainczyk and Koenders, 2014; Kim and Mohanty, 2016; Gilevska et al., 2019). A conceptual representation of “REV curve” (Brown and Hsieh, 2000), characterizing porosity ( $\theta$ ) change with measured scale ( $L$ ) increment, is presented in Fig. 1a. Based on the characteristic of REV curve in Fig. 1a, the REV curve can be divided into three regions. When measured scale (Fig. 1b) is in region I, the porosity

fluctuates drastically at small scales. As measured scale size ranging between  $L_{min}$  and  $L_{max}$ , a flat plateau with constant and steady value is encountered and the property is factored into its average value. Material property in spatial scales less than  $L_{min}$  is spatially varied portions with small scale, which can be easily influenced by individual pores in micro-structure such as region I (Fig. 1e). Likewise, material property is allowed drift to new values in spatial scale above  $L_{max}$  due to additional morphological structures of large field heterogeneity (region III). As a matter of fact, REV scale of region II can be derived between the small and spatially varied property in region I and large field variability in region III. However, the lower and upper boundaries  $L_{min}$  and  $L_{max}$  of REV plateau is hard to be identified in reality (Brown and Hsieh, 2000; Costanza-Robinson et al., 2011).

As technology advanced and progressed, non-destructive and non-invasive techniques of x-ray and gamma ray micro-tomography were utilized for micro-structure characteristic measurement in materials –(Ghilardi, 1993; Brown and Hsieh, 2000; Niemet and Selker, 2001; Bob et al., 2008; Al-Raoush and Papadopoulos, 2010; Costanza-Robinson et al., 2011; Al-Raoush, 2012; Borges and Pires, 2012; Fernandes et al., 2012; Rozenbaum and Roscoat, 2014; Pereira Nunes et al., 2016; Piccoli et al., 2019). Generally, REV estimation for material properties, inner gas and fluid also was usually implemented by micro visualization and scanning of X-ray and gamma ray in laboratory (Brown and Hsieh, 2000; Razavi –et al., 2007; Nordahl and Ringrose, 2008; Al-Raoush and Papadopoulos, 2010; Costanza-Robinson et al., 2011; Rozenbaum and Roscoat, 2014; Borges et al., 2018), while different criteria were utilized to quantify REV (Brown and Hsieh, 2000; Martínez et al., 2007; Nordahl and Ringrose, 2008; Costanza-Robinson et al., 2011). Lower boundary scale  $L_{min}$

of REV was identified by means of entropy dimension ( $\frac{DI^i}{DI^i}$ ) for eight soil samples (Martínez et al., 2007). Further, REV scale of permeability for ripple laminated sandstone intercalated with mudstone was estimated using the coefficient of variation ( $C_V^i$ ), which the REV scale is identified by the variability among the ten samples to achieve average REV scale (Nordahl and Ringrose, 2008). As a result, only one REV boundary was identified and not every sample can be estimated effectively (Nordahl and Ringrose, 2008). More interestingly, REV ~~seals for~~ of material property (porosity), moisture saturation and air-water interfacial areas in porous media were estimated by a criterion named the relative gradient error ( $\varepsilon_g^i$ ) (Costanza-Robinson et al., 2011). REVs of permeability of translucent material, PCE saturation and PCE-water interfacial area also can be estimated using the relative gradient error (Wu et al., 2017). In summary, the REV estimation was made by multiple kinds of criteria, while the REV identification effects of these criteria were not clear. What's more, these previous criteria estimate REV scale unsatisfactorily that beginning and ending of REV plateau can't be identified simultaneously for translucent porous media based on light transmission technique. Therefore, new criterion which can identify REV plateau accurately is needed.

In this study, a new criterion ( $\chi^i$ ) for REV estimation is proposed to identify the REV scale of the translucent silica and inner contaminant. ~~Two~~ Three perchloroethylene (PCE) transport experiments are conducted in two dimensional (2D) sandboxes to test the effect of different REV estimation criteria. Translucent silica is selected for associated REV analysis due to its extensive utilization in laboratory experiment of exploring groundwater flow and contaminant migration behavior in micro-structure of a sandy aquifer (Niemet and Selker,

2001; Bob et al., 2008; Costanza-Robinson et al., 2011). Moreover, translucent silica is also an important material applied in numerous industries (Bouvry et al., 2016). In laboratory experiments, translucent silica is packed in 2D sandboxes where porosity, density, tortuosity, PCE saturation are derived by light transmission technique (Fig. 1c~~a~~). Porosity and PCE saturation are selected as the representative variables to explore corresponding REV estimation by different criteria, which is very essential and significant for REV identification. Previous criteria such as the coefficient of variation ( $C_V^i$ ), entropy dimension ( $DI$ ), the relative gradient error ( $\epsilon_g^i$ ) and the new criterion- $\chi^i$  are tested in REV estimation. Associated effects are analyzed to achieve the best criterion of effective and appropriate quantification of REV.

## 2. Experiment procedure and method

### 2.1 Experiment

~~Two~~ Three sandboxes (Fig. 2a-c~~and b~~) packed by translucent silica medium are prepared in laboratory to test different criteria of REV quantification. PCE is selected as a typical DNAPL contaminant used in experiments. 2D sandbox is composed by three aluminum interior frames and two glass walls, which thickness is 1.6cm. The dimensions of sandboxes used in Experiments-I~~and II~~ are 20 (width) ×15 (height), and the dimensions of Experiments-II and III are 60 (width)×45 (height). F40/50 and F20/30 mesh translucent silica sands are used for background material for Experiments-I and II, while heterogeneous translucent silica with low porosity and permeability are packed in sandbox for Experiment-III. To make the translucent silica fully saturated by water in a flow field close to natural groundwater environment (Erning et al., 2012), water flow at flow velocity of 0.5 m/d is set

from left to right in laboratory sandbox experiments (Fig. 2a-~~c~~ and ~~b~~). Water is restricted in a sandbox that the top and bottom layers of sandbox are packed by F70/80 mesh translucent silica as capillary barriers. Light source is placed behind the sandbox to make light penetrate through translucent media and capture emergent light intensity using a thermoelectrically air-cooled charge-coupled device (CCD) camera (Fig. 1~~ca~~). Afterward, PCE is injected into sandboxes from the injection needle at constant rate of 0.5 mL /min for ~~two~~-three experiments. Detailed experimental conditions are listed in Table 1.

## 2.2 Light transmission techniques

By means of light transmission technique (Fig. 1~~ca~~), DNAPL and water saturation can be obtained rapidly and in real-time, which greatly help to explore mechanism of groundwater flow and contaminant migration in porous media. When light passes through translucent materials of a given thickness, the emergent light intensity after the absorptive and interfacial losses can be expressed as (Niemet and Selker, 2001; Bob et al., 2008; Wu et al., 2017):

$$I_T = CI_0(\prod \tau_j) \exp(-\sum \alpha_i d_i) I_T = CI_0(\prod \tau_b) \exp(-\sum \alpha_a d_a) \quad (1)$$

where  $a$  represent phase number;  $b$  represent the number of the interface between phase  $a$  and  $a+1$ ;  $I_0$  is the original light intensity;  $C$  is a constant of correction for light emission and light observation;  $\tau_{~~j~~b}$  is the transmittance when light penetrate from phase  ~~$i$~~  $a$  to  $a+1$ ;  $\alpha_{i~~a~~a}$  is the absorption coefficient when light penetrate in phase  ~~$i$~~  $a$ ;  $d_{i~~a~~a}$  is the length of light penetration path in phase  ~~$i$~~  $a$ .

To derive the porosity, the 2D translucent porous medium should be only saturated by water. Consequently, the emergent light intensity can be expressed as (Niemet and

Selker, 2001; Bob et al., 2008; Wu et al., 2017):

$$I_s = CI_0 \tau_{s,w}^{2k_o} \exp(-\alpha_s k_s d_s) \quad (2)$$

where  $\tau_{s,w}^{2k_o}$  is the transmittance of solid-water interface;  $\alpha_s$  is solid particles absorption coefficient;  $d_s$  is median diameter of the solid particles;  $k_o$  is the number of pores across light penetration path;  $k_s$  is the number of solid particles across light penetration path.

If we arbitrarily select an infinitesimal element, its area  $A_o$  approaches zero ( $A_o \rightarrow 0$ ) from the 2D translucent porous media (Fig. 1d), and suppose the infinitesimal element with thickness  $L_T$  containing solid particles and pores that can be regarded as lamellar structure (Fig. 1e), we can obtain the following relationships (Wu et al., 2017):

$$\theta A_o L_T = A_o k_o d_o \quad (3)$$

$$k_s d_s + k_o d_o = L_T \quad (4)$$

where  $d_o$  is the median diameter of pores;  $\theta$  is porosity.

Substituting Eq. (3) and Eq. (4) into Eq. (2), the relationship between emergent light intensity and porosity can be achieved (Wu et al., 2017):

$$\ln I_s = \beta + \theta \gamma \quad (5)$$

where  $\beta = \ln\left(\frac{CI_s}{e^{\alpha_s d_s L_T}}\right)$  and  $\gamma = \ln\left(\tau_{s,w}^{\frac{2L_T}{d_o}} e^{\alpha_s L_T}\right) - \gamma = \ln\left(\tau_{s,w}^{\frac{2L_s}{d_o}} e^{\alpha_s L_T}\right)$ .  $\beta$  and  $\gamma$  can be determined from experimental data, then porosity can be obtained.

The density and tortuosity are derived as (Wu et al., 2018):

$$\rho = \theta \rho_w + (1.0 - \theta) \rho_s \quad (6)$$

$$\tau = 1 + \frac{\pi - 2}{\sqrt{\frac{\pi}{1 - \theta}}} \quad (7)$$

where  $\rho$  is the density of translucent porous media;  $\rho_w$  is the density of water;  $\rho_s$  is the



density of solid particles;  $\tau$  is tortuosity .

The saturation of dense nonaqueous phase liquid (DNAPL) was quantified by light transmission technique based on light pass through translucent materials (Niemet and Selker, 2001; Bob et al., 2008):

$$S_o = \frac{\ln I_s - \ln I_T}{\ln I_s - \ln I_{oil}} \quad (8)$$

where  $S_o$  is the saturation of DNAPL;  $I_s$  is the light intensity after light penetration through translucent porous when all pores are fully saturated by water;  $I_{oil}$  is the light intensity when all pores are fully saturated by DNAPL;  $I_T$  is the light intensity after penetration through translucent materials. After quantification of PCE saturation, PCE-water interfacial area ( $A_{ow}$ ) can be obtained based on the method proposed by Wu et al. (2017), where the unit of  $A_{ow}$  is  $\text{cm}^{-1}$ .

Emergent light intensity for three experiments are captured by a thermoelectrically air-cooled charge-coupled device (CCD) camera (Niemet and Selker, 2001; Bob et al., 2008). Every pixel with small scale could be approximated as infinitesimal element in high resolution image to apply light transmission techniques. As consequence, porosity of translucent silica was derived with light transmission technique through Eq. (5). The whole 2D translucent silica area was numerically discretized that every cell had the uniform dimensions of 0.015m×0.015m. The cuboid window (Fig. 1b) was utilized to quantify the variables (porosity, density, tortuosity, PCE saturation, PCE-water interfacial area) of every cell as measured scale was increased. In detail, the measured cuboid window scale was increased from the center of each cell and associated value of variable was calculated from the high resolution porosity of 2D translucent silica derived by light transmission technique.

Observation cells were selected from the discretized cells (Fig. 3b) of which the cells I-1~2, II-1~2 and III-1~2 belong to Experiments-I-III, respectively.

To analyze the regularity of REV distribution for PCE plume, the mass center coordinate and the ganglia-to-pool ratio (GTP) of PCE plume for three experiments are quantified for Experiments-I-III. The mass center coordinate and GTP are calculated as:

$$X_m = \frac{M_{10}}{M_{00}} \quad (9)$$

$$Z_m = \frac{M_{01}}{M_{00}} \quad (10)$$

$$GTP = \frac{V_{ganglia}}{V_{pool}} \quad (11)$$

where  $X_m$  is x coordinate of mass center for PCE plume;  $Z_m$  is z coordinate of mass center for PCE plume; GTP is ganglia-to-pool ratio, which equals to the ratio of the  $V_{ganglia}$  to  $V_{pool}$ ;  $V_{ganglia}$  is the PCE volume under ganglia state;  $V_{pool}$  is the PCE volume under pool state;  $M_{00}$ ,  $M_{10}$  and  $M_{01}$  are computed using definition of spatial moment ( $M_{ij}$ ),  $M_{ij} = \int_{x_0}^{x_1} \int_{z_0}^{z_1} \theta(x, z) S_o(x, z, t) x^i z^j dx dz$ ;  $x_0$  and  $z_0$  are minimum limits of x axis and z axis;  $x_1$  and  $z_1$  are maximum limits of x axis and z axis;  $\theta(x, z)$  is the porosity at point (x, z);  $S_o(x, z, t)$  is PCE saturation of point (x, z) at time t.

### 2.3 Criteria of REV quantification

The REV is defined as the volume range in which all material characteristics are factored into the average and associated values approach single and constant (Brown and Hsieh, 2000). In the range of REV, the value of one associated property will meet the condition:

$$\frac{\partial Y(L_i)}{\partial L} \Big|_{L_i=L_o} = 0 \quad (12)$$

where the  $Y(L_i)$  is the value of an associated property when system scale is  $L_i$ ;  $L_i$  is the value of system scale;  $L_o$  is the scale range of REV,  $L_{\min} < L_o < L_{\max}$ ;  $L_{\max}$  is upper boundary of REV;  $L_{\min}$  is lower boundary of REV scale. According to the Eq. (129), when the measured scale ( $L_i$ ) reaches REV range, ~~the derivative~~  $\frac{\partial Y(L_i)}{\partial L} \rightarrow 0$  ~~will tend to zero~~. As a matter of fact, most previously used criteria were applied to estimate REV based on this requirement. ~~The REV estimation criteria tested in this study are illustrated in Table 2~~ (Brown and Hsieh, 2000; Martínez et al., 2007; Nordahl and Ringrose, 2008; Costanza-Robinson et al., 2011).

To evaluate the REV of porosity, the coefficient of variation ( $C_V^i$ ) ~~(Table 2)~~ is utilized to estimate the variability (Nordahl and Ringrose, 2008):

$$C_V^i = \frac{\hat{s}_i}{\bar{\varphi}_i} C_V^i = \frac{\hat{s}_i}{\bar{\varphi}_i} \quad (130)$$

where  $i$  is the cuboid window (Fig. 1b) increment number;  $\varphi$  is the measured variable, such as porosity;  $\hat{s}_i$  is the standard deviation of sub-grids' variable in different measured volume or scale;  $\bar{\varphi}_i$  is the arithmetic average of the variable values in the sub-grids. When number of sub-grids ( $N$ ) is less than 10, a correction is utilized to replace Eq. (130). According to Nordahl and Ringrose (2008),  $0 < C_V^i < 0.5$  is defined as homogeneous and  $C_V^i = 0.5$  can be used as criterion to identify the REV scale.

Similarly, for porosity of translucent silica, entropy dimension ( $DI^i$ ) ~~(Table 2)~~ is utilized for REV analysis and estimation (Martínez et al., 2007), which is defined as:

$$DI^i \approx \frac{\sum_{j=1}^{m(i)} \mu_j(L_e) \log \mu_j(L_e)}{\log L_e} \quad (141)$$

where,  $L_e$  is the scale of sub-grid; “ $\approx$ ” indicates the asymptotic equivalence as  $L_e \rightarrow 0$  (Martínez et al., 2007);  $j$  is the ordinal number of sub-grid in measured cuboid window (Fig. 1b) of increment number  $i$ ;  $m(i)$  is the total number of sub-grids in measured cuboid window (Fig. 1b) of increment number  $i$ ;  $\mu_j(\varepsilon)$  is the proportion of the variable of sub-grid  $j$  in the whole measured cuboid window  $i$ . The right hand side of Eq. (14) is the simplification of Shannon entropy of all sub-grids, in which  $DI^i$  can be considered as the average of logarithmic values of the variable distribution weighted by  $\mu_j(L_e)$  to quantify the degree of medium heterogeneity. Using Eq. (14), a series of values of  $DI^i$  ( $i=1,2,3\dots$ ) are obtained for each measured cuboid window (Fig. 1b) of increment number  $i$ . For estimation of the REV in a porous medium, the relative increment of entropy dimension and associated criterion of REV identification are respectively expressed as:

$$RI^i = \left| \frac{DI^j - DI^{j-1}}{DI^{j-1}} \right| \times 100 \quad RI^i = \left| \frac{DI^j - DI^{j-1}}{DI^{j-1}} \right| \times 100 \quad (15)$$

$$RI^i \leq 0.2 CV_{DI} \quad (16)$$

where  $CV_{DI}$  is the coefficient of variation of  $DI^i$  series ( $i=1,2,3\dots$ ), which is calculated through  $CV_{DI} = (\hat{s}_{DI}/\overline{DI}) \times 100$ ;  $\overline{DI}$  is the mean value of the  $DI^i$  series;  $\hat{s}_{DI}$  is the standard deviation of the  $DI^i$  series.

To achieve the REV for multiple system variables, such as porosity, moisture saturation and air-water interfacial areas in an unsaturated porous medium, a criterion named the relative gradient error (Table 2) was applied (Costanza-Robinson et al., 2011):

$$\varepsilon_g^i = \left| \frac{\varphi^{i+1} - \varphi^{i-1}}{\varphi^{i+1} + \varphi^{i-1}} \right| \frac{1}{\Delta L} \quad \varepsilon_g^i = \left| \frac{\varphi^{i+1} - \varphi^{i-1}}{\varphi^{i+1} + \varphi^{i-1}} \right| \frac{1}{\Delta L} \quad (17)$$

where  $\varepsilon_g^i$  is relative gradient error;  $\Delta L$  is the measured cuboid window size increment

length for REV estimation. Usually,  $\varepsilon_g^i$  less than 0.2 (Costanza-Robinson et al., 2011) is utilized to identify a REV sizes.

According to the requirement in Eq. (12), a new criterion based on the required condition of REV is proposed to estimate the REV range for the translucent silica in this study:

$$\chi^i = \frac{|\delta_{i+1} - \delta_{i-1}|}{\delta_i \Delta L} \chi^i = \frac{|\delta^{i+1} - \delta^{i-1}|}{\delta^i \Delta L} \quad (18)$$

where  $\delta^i$  is the dimensionless range,  $\delta^i = \frac{\phi(L_i)_{max} - \phi(L_i)_{min}}{\overline{\phi(L_i)}}$ ;  $\phi(L_i)_{max}$  is the maximum value of the variable on the volume scale  $L_i$ ;

$\phi(L_i)_{min}$  is the minimum value of the variable on the volume scale  $L_i$ ;  $\overline{\phi(L_i)}$

is the mean value of the variable on the volume scale  $L_i$ . Brown and Hsieh (2000) suggested  $\delta^i = \frac{\phi(L_i)_{max} - \phi(L_i)_{min}}{\overline{\phi(L_i)}} \ll 1$  can be used for

REV estimation. In fact, the calculated value of  $\delta^i$  mostly is less than 1, while  $\delta^i \ll 1$  is hard to be used to identify the REV scale for realistic materials, such as

the translucent silica used in this study. The value limit of  $\chi^i$  used for REV estimation also is explored in this study.

In this study, criteria for the coefficient of variation ( $C_V^i$ ), entropy dimension ( $DI^i$ ), the relative gradient error ( $\varepsilon_g^i$ ) and the new criterion ( $\chi^i$ ) are all applied in REV estimation for porosity and PCE saturation. Corresponding REV plateau identification effects are compared to select the best criterion for REV quantification.

### 3. Results and discussion

#### 3.1 REV identification effect of different criteria

##### 3.1.1 The coefficient of variation

Emergent light intensity distributions of translucent silica for ~~two~~ three experiments, which had been fully saturated by water, was obtained by a thermoelectrically air-cooled ~~charge-coupled device (CCD)~~ camera (Niemet and Selker, 2001; Bob et al., 2008). The porosity, density, tortuosity and PCE saturation for ~~two~~ three experiments are derived by light transmission technique as shown in Figs. 3a and b. The PCE spreads from the injecting point shaped like a drop of water at ~~t=1.44~~ 5 min (Fig. 3b). In 2D sandboxes for ~~two~~ three experiments, PCE plume infiltrates in translucent silica sands ~~infiltration paths~~ and ~~PCE plumes~~ reaches the bottom after  $t=80$  min.

~~Every pixel with small scale could be approximated as infinitesimal element in high resolution image to apply light transmission techniques. As consequence, porosity of translucent silica was derived with light transmission technique through Eq. (5) (Fig. 2c). The whole 2D translucent silica area was numerically discretized that every cell had the uniform dimensions of  $0.015\text{m} \times 0.015\text{m}$ . The cuboid window (Fig. 1bd) was utilized to quantify the variables (porosity, density, tortuosity, PCE saturation, PCE-water interfacial area) of every cell as measured scale was increased. In detail, the measured cuboid window scale was increased from the center of each cell and associated value of variable was calculated from the high-resolution porosity of 2D translucent silica derived by light transmission technique. Observation cells were selected from the discretized cells (Fig. 3b) of which the cells I-1-2 and II-1-2 belong to Experiments I and II, respectively. Porosity~~

and PCE saturation variation curves of ~~these~~ all observation cells with increasing measured cuboid window scale were shown in Figs. 4a and b. However, for all observation cells from translucent silica, the REV plateaus were not obvious to be objectively judged visually, which made REV plateaus hard to identify effectively by original variation curves for porosity and PCE saturation (Figs. 4a and b).

To make the REV plateau more explicit, different criteria of REV quantification are utilized. The coefficient of variation ( $C_V^i$ ) of porosity and PCE saturation fluctuating with increase of measured cuboid window size is shown in Fig. 4. The measured cuboid window scale is limited to the dimensions of cells in discretization of 2D translucent silica. The observation cells show various characteristics of variation tendency for the coefficient of variation ( $C_V^i$ ). The  $\theta$  and  $S_o$  variation curves of coefficient of variation ( $C_V^i$ ) for all observation cells do not reach stable values as those shown in Figs. 4a and b, the beginning of the REV flat plateau is not easy to identify, the coefficient of variation ( $C_V^i$ ) is not suitable for REV estimation. According to the heterogeneity definition by Corbett and Jensen (1992), the heterogeneity of materials is defined by  $C_V^i$  magnitude that  $0 < C_V^i < 0.5$  is classed as homogeneous medium,  $0.5 < C_V^i < 1.0$  is classed as heterogeneous medium and  $1.0 < C_V^i$  is classed as strong heterogeneous medium. For the coefficient of variation ( $C_V^i$ ) magnitude in Figs. 4a and b, the  $C_V^i$  values are all below 0.5 that the criterion  $C_V^i = 0.5$  is unable to identify the REV scale for translucent silica.

### 3.1.2 Entropy dimension

Entropy dimension ( $DI^i$ ) is utilized by Martínez et al. (2007) for multifractal analysis of a porous medium porosity and REV estimation. In this study, entropy dimension ( $DI^i$ ) is tested to avoid unclear REV plateau in porosity curves. The entropy dimension ( $DI^i$ ) of porosity is calculated by Eq. (14). Variation curves of entropy dimension ( $DI^i$ ) for all observation cells (Fig. 2a) are presented in Fig. 4. The curves of entropy dimension ( $DI^i$ ) of porosity and PCE saturation generally result in the increasing trend curves which makes REV estimates become very difficult and invalid. Entropy dimension ( $DI^i$ ) was quickly increased with increasing of measured cuboid window size. Compared to the coefficient of variation ( $C_V^i$ ) of porosity and PCE saturation, entropy dimension ( $DI^i$ ) increased step by step without opposite fluctuation tendency in the variation curves as length scale of measured cuboid window increased simultaneously. In general, REV plateau in region II (Fig. 1a) of porosity is not obvious for the entropy dimension ( $DI^i$ ) curves of all observation cells from ~~two~~ three experiments, which suggests REV scales is uneasy to identify for translucent silica using entropy dimension ( $DI^i$ ) by light transmission technique.

### 3.1.3 The relative gradient error

The relative gradient error ( $\epsilon_g^i$ ) of porosity and PCE saturation is calculated by Eq. (17). The variation of  $\epsilon_g^i$  at different measured cuboid window scales are shown in Fig. 4 for all observation cells in the 2D translucent silica. For all  $\epsilon_g^i$  curves at observation cells from experiments, the REV plateaus in region II (Fig. 1a) are more



clear than the variation curves based on the criteria of  $C_V^i$  and  $DI^i$ . Apparently, erratic variations of the relative gradient error ( $\epsilon_g^i$ ) at small measured cuboid window scales are observed for all  $\epsilon_g^i$  curves as the characteristic of REV region I in Fig. 1a. When measured cuboid window scale further increases for all observation cells, the variability and magnitude of the relative gradient error ( $\epsilon_g^i$ ) decrease well and factored into average, which can be identified as REV plateau in region II (Fig. 1a). The relative gradient error ( $\epsilon_g^i$ ) makes the REV plateau quantification convenient for all observation cells. At the measured cuboid window size above the REV plateau,  $\epsilon_g^i$  curves result in large variability for observation cells I-1~2. These findings suggest that the relative gradient error ( $\epsilon_g^i$ ) can make the REV plateau more obvious, which greatly contribute to convenient and applicable REV quantification for translucent silica by light transmission technique. However, random fluctuations exist in  $\epsilon_g^i$  curves visually, which make the REV plateau uneasy to identify accurately.

#### 3.1.4 The new criterion ( $\chi^i$ )

$\chi^i$  of porosity and PCE saturation changing with measured cuboid window size is shown in Fig. 4. Like the region I (Fig. 1a), erratic and random fluctuations appears at small measured cuboid window sizes and  $\chi^i$  increases with the increase of the measured cuboid window size. When measured scale increases, the values of  $\chi^i$  for all observation cells appear fast reduction and rapidly tend to steady, which exhibit the characteristic of REV plateau as measured scale reaches region II. The  $\chi^i$  for observation cells restore the erratic variation state of increasing trend after measured cuboid window size exceeding the REV plateau. As shown in the variation curves of  $\chi^i$  for all observation cells, the beginning

of the REV flat plateaus can be identified easily, suggesting  $\chi^i$  is more convenient and reliable than other methods for REV estimation. All observation cells show similar variation curves of  $\chi^i$  that low value intervals are quite apparent, indicating that  $\chi^i$  is very effective to make the REV plateau obvious for translucent silica used in this study. Using the criterion of  $\chi^i$ , the REV plateau of region II is flat, which is easily identified, compared with other criteria for observation cells (Figs. 4a and b).

### 3.2 REVs of material properties

Based on the REV plateau identifications using the coefficient of variation ( $C_V^i$ ), entropy dimension ( $DI^i$ ), the relative gradient error ( $\epsilon_g^i$ ) and the proposed new criterion  $\chi^i$  in Figs. 4a and b, the new criterion  $\chi^i$  appears to be the most appropriate criterion for REV plateau identification. Even though the relative gradient error ( $\epsilon_g^i$ ) can also make REV plateau obvious, but various random fluctuations weaken the method and reduce the associated accuracy. Therefore, REVs of porosity, density, tortuosity and PCE plume are estimated using the new criterion  $\chi^i$  in the following study.

In fact, large number of discretized cells in the 2D translucent silica for ~~two~~ three experiments are quantified using the new criterion  $\chi^i$ , which is convenient to examine the regularities for REV sizes and related factors. Using the new criterion  $\chi^i$ , the REV estimation is conducted based on Eq. (158). Fig. 5a shows minimum REV sizes of porosity, density and tortuosity quantified by  $\chi^i$  for all cells of ~~two~~ three experiments. Associated statistical analysis for REVs is illustrated in Fig. 5b, where circular points represent frequency and triangular points represent cumulative frequency. Frequency of REVs is dense in the middle and sparse on both sides, so the distribution of REVs can be fitted by Gaussian equation:

$$F = \omega + \frac{1}{\sqrt{2\pi}\delta} e^{-\frac{(REV-v)^2}{2\delta^2}} \quad F = \omega + \frac{1}{\sqrt{2\pi}\epsilon} e^{-\frac{(REV-v)^2}{2\epsilon^2}} \quad (196)$$

where F is the frequency of REV;  $\omega$ ,  $\delta$  and  $v$  are fitted parameters of the model.

After regression analysis, the derived models for REV frequency are listed in Table 32.

The coefficients of determination ( $R^2$ ) of models for REV of porosity and density for three

experiments all exceed 0.8593.  $R^2$  for REV of tortuosity for two-three experiments exceed

0.76. Moreover, the computed cumulative frequency based on models fit cumulative

frequency from experimental results well in Fig. 5b.

The minimum REV size frequency for porosity appears a peak between 4.0 mm and

5.0 mm for Experiment-I. As minimum REV size of porosity increases, corresponding

frequency continuously decreases. Further, smooth convex shape of cumulative frequency

is observed for minimum REV size of porosity (Fig. 5b). Most minimum REV sizes of

translucent silica distributed in 0.0-7.0mm. For density of translucent silica sand, associated

REV frequency appears high values between 2.0~3.0 mm. For the REV sizes of tortuosity,

minimum REV sizes distribute in 0.0~6.0 mm. Compared with Experiment-I (F40/50 mesh

translucent silica sand), the frequency of REV for Experiment-II (F20/30 mesh translucent

silica sand with larger porosity) show flat shape and has larger value of standard deviation,

especially for REV of porosity. Fig. 5b shows that translucent silica with larger porosity will

achieve border distribution of minimum REV sizes distribution compared to translucent

silica with relative lower porosity. Moreover, the frequency of REV of porosity and

permeability for Experiment-III (background material is F20/30 mesh translucent silica sand

with larger porosity, five lenses with lower porosity is packed in sandbox to create

heterogeneity) is similar to the frequency of REV for Experiment-II. However, the

frequency of  $\tau$ -REV for Experiment-III is different from the frequency of  $\tau$ -REV for Experiment-II under homogeneous condition. The mean REV sizes of porosity, density and tortuosity for Experiment-I are 4.35 mm, 2.89 mm and 3.65 mm, respectively. All mean REV sizes of these variables for Experiment-II are larger than REV sizes of Experiment-I, which corresponding mean REV sizes are 8.05 mm, 2.97 mm and 4.30 mm. These results suggest translucent porous media with higher porosity lead to larger values of mean and standard deviation for REV sizes.

### 3.3 REV sizes of $S_o$ and $A_{OW}$ for PCE plume

Based on the new criterion  $\chi^i$  and light transmission technique, the real-time distributions of  $S_o$ -REV and  $A_{OW}$ -REV for PCE plume can be obtained over the entire experimental period. The minimum REV sizes of  $S_o$  and  $A_{OW}$  obtained using new criterion  $\chi^i$  are shown in Figs. 6a and b.— When PCE migrates in sandbox, the REV sizes of PCE plume is changed over time (Fig. 6). The REV sizes of PCE plume for Experiment-I mostly are lower than the REV sizes of PCE plume for Experiments-II and III. Moreover, when heterogeneous porous media is packed in sandbox, the REV distribution of Experiment-III become more heterogeneous compared with REV distribution of Experiment-II under homogeneous condition. Based on REV distributions of PCE plume for three experiments, statistical analysis is conducted to explore the regularity of REV distribution for PCE plume. —To analyze the regularity of REV distribution for PCE plume, the mass center coordinate of PCE plume for two experiments are quantified for Experiments I and II. The mass center coordinate are calculated as:

$$x_m = \frac{M_{10}}{M_{00}} \quad (17)$$

$$z_m = \frac{M_{01}}{M_{00}} \quad (18)$$

where  $x_m$  is x coordinate of mass center for PCE plume;  $z_m$  is z coordinate of mass center for PCE plume;  $M_{00}$ ,  $M_{10}$  and  $M_{01}$  are computed using definition of spatial moment ( $M_{ij}$ ),  $M_{ij} = \int_{x_0}^{x_1} \int_{z_0}^{z_1} \theta(x,z) S_o(x,z,t) x^i z^j dx dz$ ;  $x_0$  and  $z_0$  are minimum limits of x axis and z axis;  $x_1$  and  $z_1$  are maximum limits of x axis and z axis;  $\theta(x,z)$  is the porosity at point (x,z);  $S_o(x,z,t)$  is PCE saturation of point (x, z) at time t.

The mass center coordinate of PCE plume, GTP and plume area derived by Eq. (18) are shown in Fig. 7a. The values of  $X_m$ ,  $Z_m$  and GTP for Experiment-II and III are higher than the  $X_m$ ,  $Z_m$  and GTP of Experiment-I (lower porosity). Moreover, the plume area of Experiment-II is larger than the plume of Experiment-I. When packed material is heterogeneous, the plume area of PCE is increased further for Experiment-III. Besides, the mean and standard deviation of REV's of PCE plume during 0~1523 min are derived by statistical analysis (Fig. 7a). Compared with REV's of PCE plume for Experiment-I, Experiment-II (F20/30 mesh translucent silica sand with higher porosity) has larger value of mean and standard deviation of REV's. The mean value of  $A_{OW}$ -REV for Experiment-III is much higher than  $A_{OW}$ -REV for Experiments-I and II.

Afterward, t The average value of REV's ( $\overline{REV}$ ) and associated distance ( $d_m$ ) from mass center to corresponding cells contained in PCE plume at t=1523 min are presented in Fig. 7b. Regression analysis is performed for average REV's of PCE plume and  $d_m$ , where fitted models and associated  $R^2$  for Experiments-I-III and II are listed in Table 43.

Simultaneously, the fitted equations between  $\overline{REV}$  and  $d_I$  (the distance from injection point to cell contained in PCE plume) also are derived by regression analysis. From the results in Fig. 7a,  $\overline{REV}$  of  $S_o$  and  $A_{ow}$  appear a peak and then decrease with increasing of  $d_m$  and  $d_I$  for Experiment-I.  $\overline{REV}$  of  $S_o$  and  $A_{ow}$  for Experiment-I all firstly increase and then decrease with the increasing of  $d_m$  and  $d_I$ . However,  $\overline{REV}$  of PCE plume  $S_o$  presents apparent decreasing tendency as  $d_m$  and  $d_I$  increase for Experiment-II, and  $\overline{REV}$  of  $A_{ow}$  just slightly increase first and then decrease for Experiment-II. In addition, the value of  $A_{ow}$ -REV mostly is higher than the value of  $S_o$ -REV for two-three experiments. Compared with the  $R^2$  of the fitted relationship between average REV of PCE plume and  $d_m$ ,  $d_I$  for Experiments-I and II, the values of  $R^2$  achieved by Experiment-III are much lower (Table 3).

The mean and standard deviation of REV of PCE plume during 0–1523 min derived by statistical analysis (Fig. 7b). Compared with REV of PCE plume for Experiment-I, Experiment-II (F20/30 mesh translucent silica sand with higher porosity) has larger value of mean and standard deviation of REV. Besides, the relationship between REV and PCE saturation are fitted by regression analysis, where fitted equation and  $R^2$  for two-three experiments are listed in Table 45 and Fig. 7b. With increasing of PCE saturation, REV of  $S_o$  appear decline trend for two-three experiments. However, REV of  $A_{ow}$  increases when  $S_o$  increases for both two all three experiments (Fig. 7b). On the other hand, REV of  $S_o$  for Experiment-II is higher than corresponding REV for Experiment-I, while Experiments-I and II have similar values of  $A_{ow}$ -REV (Fig. 7b). Moreover, REV of  $S_o$  and  $A_{ow}$  for Experiment-III are higher than REV of  $S_o$  and  $A_{ow}$  for Experiments-I and II. These results

suggest higher porosity will lead to high value of  $S_o$ -REV and the relationship between REV<sub>s</sub> of PCE plume and  $d_m$ ,  $d_l$ .  $S_o$ -REV and  $A_{ow}$ -REV are increased under heterogeneous condition.

#### 4. Conclusions

In this study, a new criterion  $\chi^i$  is proposed to identify the REV<sub>s</sub> of translucent porous media and inner contaminant transformation based on previous criteria. The REV plateaus of observation cells selected from ~~two~~ three experiments of PCE transport are hard to judge visually from the porosity and PCE saturation curves. From the REV identification effects of different criteria, the REV flat plateau is difficult to identify by coefficient of variation ( $C_V^i$   ~~$C_V^i$~~ ) and entropy dimension ( $DI^i$   ~~$DI^i$~~ ), indicting the coefficient of variation ( $C_V^i$   ~~$C_V^i$~~ ) and entropy dimension ( $DI^i$   ~~$DI^i$~~ ) are not suitable for REV estimation of translucent porous media. The relative gradient error ( $\epsilon_g^i$   ~~$\epsilon_g^i$~~ ) can make REV plateaus of all kinds of translucent silica explicit in variation curves, but random fluctuations weaken REV plateau identification. In comparison with these previous criteria, the beginning and ending of the REV flat plateaus could be easily and directly identified in the curves based on the new criterion  $\chi^i$ , suggesting the new criterion  $\chi^i$  is more convenient and effective for REV estimation. In this study, REV<sub>s</sub> of porosity, density, tortuosity, and PCE plume are estimated using the new criterion  $\chi^i$ .

Statistical results of minimum REV scales quantified by new criterion  $\chi^i$  reveal cumulative frequencies of porosity, density and tortuosity all have smooth convex shapes. Models based on Gaussian equation are built for the distribution of REV<sub>s</sub> of porosity, density and tortuosity, which porous media with larger porosity leads to larger values of

mean and standard deviation for REV sizes of media properties. For REV sizes of PCE plume, result suggested larger porosity lead to larger value of mean and standard deviation. Regression analysis is performed to study the regularity for distribution of REV sizes, where fitted relationship between REV sizes and  $d_m$ ,  $d_l$  are derived for PCE plume.  $\overline{REV}$  of  $S_o$  and  $A_{ow}$  firstly increase and then decrease with the increasing of  $d_m$  and  $d_l$  for Experiment-I whose sandbox packed by translucent porous media with relatively lower porosity. However,  $\overline{REV}$  of  $S_o$  and  $A_{ow}$  directly decrease with the increment of  $d_m$  and  $d_l$  when porosity became larger for Experiment-II. The values of  $R^2$  of the fitted relationship between average REV sizes of PCE plume and  $d_m$ ,  $d_l$  for Experiment-III are much lower under heterogeneous condition. Significantly, REV size of  $S_o$  presented decreasing trend as  $S_o$  increases, while increasing tendency appeared for REV size of  $A_{ow}$ . Through regression analysis, the fitted equations between REV sizes of PCE plume and PCE saturation are derived for ~~two~~-three experiments. Implications of these findings are essential for quantitative investigation of scale effect of porous media and contaminant transformation. The fluid migration and transform in porous media can be simulated accurately according to the REV estimation results using light transmission technique and the appropriate criterion  $\chi^i$ .

#### **Code and data availability**

The codes and data for this paper are available by contacting the corresponding author at [jfwu@nju.edu.cn](mailto:jfwu@nju.edu.cn).



504 **Author contributions**

505 Ming Wu: Conceptualization, Methodology, Writing;

506 Jianfeng Wu: Conceptualization, Methodology, Writing;

507 Jichun Wu: Conceptualization;

508 Bill X. Hu: Conceptualization, Writing.

509 **Declaration of interests**

510 The authors declare that they have no known competing financial interests or personal  
511 relationships that could have appeared to influence the work reported in this paper.

512 **Acknowledgments**

513 We acknowledge support by the National Key Research and Development Plan of  
514 China ([2019YFC1805302](#) and 2016YFC0402800), the National Natural Science  
515 Foundation of China (41902246, 41730856 and 41772254), [the Natural Science Foundation](#)  
516 [of Guangdong Province \(2020A1515010447\)](#) and [the Fundamental Research Funds for the](#)  
517 [Central Universities \(14380105\)](#)~~the National Natural Science Foundation of China-~~  
518 ~~Xianjiang Project (U1503282) and the China Postdoctoral Science Foundation~~  
519 ~~(2017M622905).~~

520 **References**

521 Al-Raoush, R., and Papadopoulos, A.: Representative elementary volume analysis of porous  
522 media using X-ray computed tomography, Power Technol., 200, 60-77, 2010.

523 Al-Raoush, R.: Change in Microstructure Parameters of Porous Media Over Representative  
524 Elementary Volume for Porosity, Part. Sci. Technol., 30, 1-16, 2012.

525 Bai, L., Wang, X., Chen, Q., Ye, Y., Zheng, H., Guo, J., Yin, Y., and Gao, C.: Explaining the  
526 Size Dependence in Platinum-Nanoparticle-Catalyzed Hydrogenation Reactions,  
527 Angew. Chem. Int. Ed., 55, 15656-15661, 2016.

528 Bob, M.M., Brooks, M.C., Mravik, S.C., and Wood, A.L.: A modified light transmission  
529 visualization method for DNAPL saturation measurements in 2-D models, Adv.  
530 Water Resour., 31, 727-742, 2008.

531 Borges, J.A.R., and Pires, L.F.: Representative elementary area (REA) in soil bulk density  
532 measurements through gamma ray computed tomography, Soil Till. Res., 123, 43-  
533 49, 2012.

534 Borges, J.A.R., Pires, L.F., Cássaro, F.A.M., Roque, W.L., Heck, R.J., Rosa, J.A., and Wolf,  
535 F.G.: X-ray microtomography analysis of representative elementary volume (REV)  
536 of soil morphological and geometrical properties, Soil Till. Res., 182, 112-122,  
537 2018.

538 Bouvry, B., del Campo, L., Meneses, D.D.S., Rozenbaum, O., Echegut, R., Lechevalier, D.,  
539 Gaubil, M., and Echegut, P.: Hybrid methodology for retrieving thermal radiative  
540 properties of semi-transparent ceramics, J. Phys. Chem. C, 120, 3267-3274, 2016.

541 Bradford, S.A., Vendlinski, R.A., and Abriola, L.M.: The entrapment and long-term  
542 dissolution of tetrachloroethylene in fractional wettability porous media, Water  
543 Resour. Res., 35(10), 295-2964, 1999.

544 Brown, G.O., and Hsieh, H.T.: Evaluation of laboratory dolomite core sample size using

545 representative elementary volume concepts, *Water Resour. Res.*, 36(5), 1199-1207,  
 546 2000.

547 Corbett, P.W.M., and Jensen, J.L.: Estimating the mean permeability: how many  
 548 measurement do we need? *First Break*, 10(3), 89-94, 1992.

549 Costanza-Robinson, M.S., Estabrook, B.D., and Fouhey, D.F.: Representative elementary  
 550 volume estimation for porosity, moisture saturation, and air-water interfacial areas  
 551 in unsaturated porous media: Data quality implication, *Water Resour. Res.*, 47,  
 552 W07513, 2011.

553 Erning, K., Grandel, S., Dahmke, A., and Schäfe, D.: Simulation of DNAPL infiltration and  
 554 spreading behavior in the saturated zone at varying flow velocities and alternating  
 555 subsurface geometries, *Environ. Earth Sci.*, 65, 1119-1131, 2012.

556 Esfandiar, A., Radha, B., Wang, F.C., Yang, Q., Hu, S., Garaj, S., Nair, R.R., Geim, A.K.,  
 557 and Gopinadhan, K.: Size effect in ion transport through angstrom-scale slits,  
 558 *Science*, 358, 511-513, 2017.

559 Fernandes, J.S., Appoloni, C.R., and Fernandes, C.P.: Determination of the Representative  
 560 Elementary Volume for the study of sandstones and siltstones by X-Ray  
 561 microtomography, *Mater. Res.*, 15(4), 662-670, 2012.

562 Ghilardi, P., Kai, A.K., and Menduni, G.: Self-similar heterogeneity in granular porous  
 563 media at the representative elementary volume scale, *Water Resour. Res.*, 29(4),  
 564 1205-1214, 1993.

565 Gilevska, T., Passeport, E., Shayan, M., Seger, E., Lutz, E.J., West, K.A., Morgan, S.A.,  
 566 Mack, E.E., and Lollar, B.S.: Determination of in situ biodegradation rates via a

567 novel high resolution isotopic approach in contaminated sediments, *Water Res*, 149,  
 568 632-639, 2019.

569 Hendrick, A.G., Erdmann, R.G., and Goodman, M.R.: Practical Considerations for  
 570 Selection of Representative Elementary Volumes for Fluid Permeability in Fibrous  
 571 Porous Media, *Transp. Porous Med.*, 95, 389-405, 2012.

572 Kang, Q.J., Zhang, D.X., and Chen, S.Y.: Simulation of dissolution and precipitation in  
 573 porous media, *J. Geophys. Res.* 108, NO. B10, 2505, doi:10.1029/2003JB002504,  
 574 2003.

575 Kim, J., and Mohanty, B.P.: Influence of lateral subsurface flow and connectivity on soil  
 576 water storage in land surface modeling, *J. Geophys. Res. Atmos.*, 121,704-721,  
 577 2016.

578 Lei, S., and Shi, Y.: Separate-phase model and its lattice Boltzmann algorithm for liquid-  
 579 vapor two-phase flows in porous media, *Phys. Rev. E*, 99, 053302, 2019.

580 Martínez, F.S.J., Caniego, F.J., García-Gutiérrez, C., and Espejo, R.: Representative  
 581 elementary area for multifractal analysis of soil porosity using entropy dimension,  
 582 *Nonlin. Processes Geophys.*, 14, 503-511, 2007.

583 Müller, C., and Siegesmund, S.: Evaluation of the representative elementary volume (REV)  
 584 of a fractured geothermal sandstone reservoir, *Environ. Earth Sci.*, 61, 1713-1724,  
 585 2010.

586 Niemet, M.R., and Selker, J.S.: A new method for quantification of liquid saturation in 2D  
 587 translucent porous media systems using light transmission, *Adv. Water Resour.*, 24,  
 588 651-666, 2001.

589 Nordahl, K., and Ringrose, P.S.: Identifying the Representative Elementary Volume for  
 590 permeability in heterolithic deposits using numerical rock models, *Math Geosci.*,  
 591 40, 753-771, 2008.

592 O'Carroll, D.M., Bradford, S.A., and Abriola, L.M.: Infiltration of PCE in a system  
 593 containing spatial wettability variations, *J. Contam. Hydrol.*, 73, 39-63, 2004.

594 Pereira Nunes, J.P., Blunt, M.J., and Bijeljic, B.: Pore-scale simulation of carbonate  
 595 dissolution in micro-CT images, *J. Geophys. Res. Solid Earth*, 121, 558-576, 2016.

596 Piccoli, I, Schjønning, P., Lamandé, M., Zanini, F., and Morari, F.: Coupling gas transport  
 597 measurements and X-ray tomography scans for multiscale analysis in silty soils,  
 598 *Geoderma*, 338, 576-584, 2019.

599 Razavi, M.R., Muhunthan, B., and Al Hattamleh, O.: Representative elementary volume  
 600 analysis of sands using x-ray computed tomography, *Geotech. Test J.*, 30(3), 212-  
 601 219, 2007.

602 Rozenbaum, O., and du Roscoat, S.R.: Representative elementary volume assessment of  
 603 three-dimensional x-ray microtomography images of heterogeneous  
 604 materials: Application to limestones, *Phys. Rev. E*, 89, 053304, 2014.

605 Teruel, F.E., and Rizwan-uddin: Numerical computation of macroscopic turbulence  
 606 quantities in representative elementary volumes of the porous medium, *Int. J. Heat*  
 607 *Mass Transfer.*, 53, 5190-5198, 2010.

608 Ukrainczyk, N., and Koenders, E.A.B.: Representative elementary volumes for 3D  
 609 modeling of mass transport in cementitious materials, *Modelling Simul. Mater. Sci.*  
 610 *Eng.*, 22, 035001, 2014.

611 Wang, L., Mi, J., and Guo, Z.: A modified lattice Bhatnagar–Gross–Krook model for  
612 convection heat transfer in porous media, *Int. J. Heat Mass Transfer.*, 94, 269-291,  
613 2016.

614 Wang, S., Elsworth, D., and Liu, J.: A mechanistic model for permeability evolution in  
615 fractured sorbing media, *J. Geophys. Res.*, 117, B06205,  
616 doi:10.1029/2011JB008855, 2012.

617 Wu, M., Wu, J.F., and Wu, J.C.: Simulation of DNAPL migration in heterogeneous  
618 translucent porous media based on estimation of representative elementary volume, *J. Hydrol.*, 553, 276-288, 2017.

620 Wu, M., Wu, J.F., Wu, J.C., and Hu, B.X.: Effects of microarrangement of solid particles on  
621 PCE migration and its remediation in porous media, *Hydrol. Earth Syst. Sci.*, 22,  
622 1001-1015, 2018.

623

624 **Table 1.** Experimental conditions

| Experiment                                                          | I                      | II                     | <u>III</u>                   |
|---------------------------------------------------------------------|------------------------|------------------------|------------------------------|
| Sandbox dimensions (cm)                                             | 20×15                  | 60×45                  | <u>60×45</u>                 |
| <del>Packed translucent silica</del>                                | F40/50                 | F20/30                 | <u>F20/30</u>                |
| <del>sand</del> <u>Background translucent</u><br><u>silica sand</u> |                        |                        |                              |
| <u>Medium condition</u>                                             | <u>Homogeneity</u>     | <u>Homogeneity</u>     | <u>Heterogeneity</u>         |
| Median grain diameter (mm)                                          | 0.36                   | 0.72                   | <u>0.72</u>                  |
| Permeability (m <sup>2</sup> )                                      | 4.25×10 <sup>-11</sup> | 1.35×10 <sup>-10</sup> | <u>1.35×10<sup>-10</sup></u> |
| V <sub>PCE</sub> (ml)                                               | 9                      | 32                     | <u>40</u>                    |
| Injection rate (ml/min)                                             | 0.5                    | 0.5                    | <u>0.5</u>                   |

625

626

627

**Table 2.** Criteria of REV estimation

| Criterion                    | Equation                                                                                         |
|------------------------------|--------------------------------------------------------------------------------------------------|
| The coefficient of variation | $C_v^i = \frac{\hat{s}}{\bar{\varphi}_i}$                                                        |
| entropy dimension            | $DI^i \approx \frac{\sum_{j=1}^{m(i)} \mu_j(L_e) \log \mu_j(L_e)}{\log L_e}$                     |
| the relative gradient error  | $e_g^i = \frac{\varphi^{i+1} - \varphi^{i-1}}{\varphi^{i+1} + \varphi^{i-1}} \frac{1}{\Delta L}$ |
| New criterion                | $\chi^i = \frac{ \delta_{i+1} - \delta_{i-1} }{\delta_i \Delta L}$                               |

628

629



**Table 23.** The fitted equations of frequency for REV's of porosity, density and tortuosity

| Experiment    | I                                                                                                                                   | II                                                                                                                                  |
|---------------|-------------------------------------------------------------------------------------------------------------------------------------|-------------------------------------------------------------------------------------------------------------------------------------|
| $\theta$ -REV | $F = -2.01 \times 10^{-12} + \frac{1}{\sqrt{2\pi} \times 1.50} e^{-\frac{(\text{REV}-4.35)^2}{2 \times 1.50^2}}$<br>( $R^2=0.955$ ) | $F = -5.30 \times 10^{-3} + \frac{1}{\sqrt{2\pi} \times 3.35} e^{-\frac{(\text{REV}-8.05)^2}{2 \times 3.35^2}}$<br>( $R^2=0.932$ )  |
| $\rho$ -REV   | $F = -7.51 \times 10^{-26} + \frac{1}{\sqrt{2\pi} \times 1.14} e^{-\frac{(\text{REV}-2.89)^2}{2 \times 1.14^2}}$<br>( $R^2=0.969$ ) | $F = -3.18 \times 10^{-12} + \frac{1}{\sqrt{2\pi} \times 1.71} e^{-\frac{(\text{REV}-2.97)^2}{2 \times 1.71^2}}$<br>( $R^2=0.989$ ) |
| $\tau$ -REV   | $F = -2.76 \times 10^{-15} + \frac{1}{\sqrt{2\pi} \times 1.42} e^{-\frac{(\text{REV}-3.65)^2}{2 \times 1.42^2}}$<br>( $R^2=0.774$ ) | $F = -8.55 \times 10^{-8} + \frac{1}{\sqrt{2\pi} \times 2.15} e^{-\frac{(\text{REV}-4.30)^2}{2 \times 2.15^2}}$<br>( $R^2=0.850$ )  |

\*F represents the frequency of REV,  $\theta$  represents porosity,  $\rho$  represents density,  $\tau$  represents tortuosity

| Experiment | I                      | II                     | III                   |
|------------|------------------------|------------------------|-----------------------|
| $\omega$   | $-2.11 \times 10^{-4}$ | $-1.45 \times 10^{-3}$ | $7.63 \times 10^{-4}$ |
| $\epsilon$ | $1.73$                 | $3.45$                 | $3.18$                |
| $v$        | $4.35$                 | $7.90$                 | $6.50$                |
| $R^2$      | $0.938$                | $0.924$                | $0.907$               |
| $\omega$   | $-6.51 \times 10^{-4}$ | $-2.51 \times 10^{-4}$ | $1.51 \times 10^{-3}$ |
| $\epsilon$ | $1.08$                 | $1.66$                 | $2.40$                |
| $v$        | $2.89$                 | $2.97$                 | $3.70$                |
| $R^2$      | $0.967$                | $0.990$                | $0.859$               |
| $\omega$   | $-3.36 \times 10^{-4}$ | $-2.04 \times 10^{-4}$ | $1.29 \times 10^{-3}$ |
| $\epsilon$ | $1.39$                 | $2.15$                 | $1.20$                |
| $v$        | $3.65$                 | $4.20$                 | $1.05$                |
| $R^2$      | $0.769$                | $0.875$                | $0.919$               |

\* $\theta$  represents porosity,  $\rho$  represents density,  $\tau$  represents tortuosity;  $\omega$ ,  $\epsilon$  and  $v$  are fitted parameters of the model

637 **Table 34.** The fitted equations between average value of REV and  $d_I$ ,  $d_m$

| Experiment | I                                                                                   |                                                                                                   | II                                                                                                |                                                                                                   |
|------------|-------------------------------------------------------------------------------------|---------------------------------------------------------------------------------------------------|---------------------------------------------------------------------------------------------------|---------------------------------------------------------------------------------------------------|
|            | $S_o$ -REV                                                                          | $A_{ow}$ -REV                                                                                     | $S_o$ -REV                                                                                        | $A_{ow}$ -REV                                                                                     |
| $d_m$      | $\overline{REV} = -1.67 \times 10^{-3} d_m^2 + 0.193 d_m + 2.72$<br>( $R^2=0.807$ ) | $\overline{REV} = -6.10 \times 10^{-4} d_m^2 + 5.82 \times 10^{-2} d_m + 7.20$<br>( $R^2=0.401$ ) | $\overline{REV} = -4.08 \times 10^{-5} d_m^2 + 1.50 \times 10^{-2} d_m + 7.54$<br>( $R^2=0.655$ ) | $\overline{REV} = -1.92 \times 10^{-5} d_m^2 + 4.47 \times 10^{-3} d_m + 9.46$<br>( $R^2=0.616$ ) |
| $d_I$      | $\overline{REV} = -1.97 \times 10^{-3} d_I^2 + 0.245 d_I + 1.12$<br>( $R^2=0.832$ ) | $\overline{REV} = -1.47 \times 10^{-3} d_I^2 + 0.205 d_I + 1.84$<br>( $R^2=0.733$ )               | $\overline{REV} = -3.94 \times 10^{-5} d_I^2 + 7.80 \times 10^{-3} d_I + 8.50$<br>( $R^2=0.327$ ) | $\overline{REV} = -1.92 \times 10^{-5} d_m^2 + 4.47 \times 10^{-3} d_m + 9.46$<br>( $R^2=0.616$ ) |

| Experiment | $d_m$                                                                                             | $d_I$                                                                                             |
|------------|---------------------------------------------------------------------------------------------------|---------------------------------------------------------------------------------------------------|
| I          | $\overline{REV} = -1.67 \times 10^{-3} d_m^2 + 0.193 d_m + 2.72$<br>( $R^2=0.807$ )               | $\overline{REV} = -1.97 \times 10^{-3} d_I^2 + 0.245 d_I + 1.12$<br>( $R^2=0.832$ )               |
|            | $\overline{REV} = -6.10 \times 10^{-4} d_m^2 + 5.82 \times 10^{-2} d_m + 7.20$<br>( $R^2=0.401$ ) | $\overline{REV} = -1.47 \times 10^{-3} d_I^2 + 0.205 d_I + 1.84$<br>( $R^2=0.733$ )               |
|            | $\overline{REV} = -4.08 \times 10^{-5} d_m^2 + 1.50 \times 10^{-2} d_m + 7.54$<br>( $R^2=0.655$ ) | $\overline{REV} = -3.94 \times 10^{-5} d_I^2 + 7.80 \times 10^{-3} d_I + 8.50$<br>( $R^2=0.327$ ) |
|            | $\overline{REV} = -1.92 \times 10^{-5} d_m^2 + 4.47 \times 10^{-3} d_m + 9.46$<br>( $R^2=0.616$ ) | $\overline{REV} = -1.92 \times 10^{-5} d_I^2 + 4.47 \times 10^{-3} d_I + 9.46$<br>( $R^2=0.616$ ) |
| II         | $\overline{REV} = -6.06 \times 10^{-6} d_m^2 + 2.27 \times 10^{-3} d_m + 7.76$<br>( $R^2=0.153$ ) | $\overline{REV} = 1.69 \times 10^{-5} d_I^2 - 1.21 \times 10^{-2} d_I + 9.62$<br>( $R^2=0.236$ )  |
|            | $\overline{REV} = -8.71 \times 10^{-6} d_m^2 + 5.66 \times 10^{-3} d_m + 11.5$<br>( $R^2=0.115$ ) | $\overline{REV} = -1.50 \times 10^{-5} d_I^2 + 7.88 \times 10^{-3} d_I + 11.4$<br>( $R^2=0.150$ ) |

640 \*  $\overline{REV}$  is the average value of REV size,  $d_m$  is the distance from mass center of PCE

641 plume to the cell contained in PCE plume,  $d_i$  is the distance from injection point to the cell  
642 contained in PCE plume  
643  
644

645 **Table 45.** The fitted relationship between REV and  $S_o$

| Experiment                         | I                                                                                                 | II                                                                                                |
|------------------------------------|---------------------------------------------------------------------------------------------------|---------------------------------------------------------------------------------------------------|
| <del><math>S_o</math>-REV</del>    | <del><math>REV = -2.13 \times \ln S_o + 0.876</math></del><br><del><math>(R^2=0.466)</math></del> | <del><math>REV = -0.961 \times \ln S_o + 1.09</math></del><br><del><math>(R^2=0.415)</math></del> |
| <del><math>A_{ow}</math>-REV</del> | <del><math>REV = 2.27e^{2.70 \times S_o}</math></del><br><del><math>(R^2=0.366)</math></del>      | <del><math>REV = 1.70e^{3.30 \times S_o}</math></del><br><del><math>(R^2=0.500)</math></del>      |

646

| <u>Experiment</u> | <u><math>S_o</math>-REV</u>                                             | <u><math>A_{ow}</math>-REV</u>                                     |
|-------------------|-------------------------------------------------------------------------|--------------------------------------------------------------------|
| <u>I</u>          | $REV = -2.13 \times \ln S_o + 0.876$<br><u><math>(R^2=0.466)</math></u> | $REV = 2.27e^{2.70 \times S_o}$<br><u><math>(R^2=0.366)</math></u> |
| <u>II</u>         | $REV = -0.961 \times \ln S_o + 1.09$<br><u><math>(R^2=0.415)</math></u> | $REV = 1.70e^{3.30 \times S_o}$<br><u><math>(R^2=0.500)</math></u> |
| <u>III</u>        | $REV = -1.40 \times \ln S_o + 3.96$<br><u><math>(R^2=0.538)</math></u>  | $REV = 2.05e^{3.22 \times S_o}$<br><u><math>(R^2=0.573)</math></u> |

647

648

649

650

## Figure Captions

**Figure 1.** ~~(a) System Device for acquisition of properties of translucent material; (b) The infinitesimal selected from translucent porous media packed in 2D sandbox; (ae)~~  
Variable changes as measured scale ( $L$ ) increment in conceptual curve (Costanza-  
Robinson et al., 2011); ~~(bd)~~ Scale effect and the cuboid image window geometry; (c)  
System Device for acquisition of parameters (porosity and density, etc.) of  
translucent material; (d) The infinitesimal selected from translucent porous media  
packed in 2D sandbox.

**Figure 2.** (a) The system sandbox equipment of Experiment-I; (b) The system sandbox  
equipment of Experiment-II; (c) The system sandbox equipment of Experiment-III

**Figure 3.** (a) The emergent light intensity, porosity, permeability and tortuosity of 2D  
translucent silica sand for Experiments-I-III ~~and H~~; (b) The PCE saturation of  
Experiments-I-III ~~and H~~ during 0~1523 min and observation cells

**Figure 4.** (a) The change of porosity ( $\theta$ ), associated coefficient of variation ( $C_V^i$   ~~$C_V^i$~~ ), entropy  
dimension ( $DI^i$   ~~$DI^i$~~ ), the relative gradient error ( $\epsilon_g^i$   ~~$\epsilon_g^i$~~ ), and new criterion- $\chi^i$  for  
observation cells as cuboid window scale ( $L$ ) increases; (b) The change of PCE  
saturation ( $S_o$ ), associated  $C_V^i$   ~~$C_V^i$~~ ,  $DI^i$   ~~$DI^i$~~ ,  $\epsilon_g^i$   ~~$\epsilon_g^i$~~ , and  $\chi^i$  for observation cells as  
cuboid window scale ( $L$ ) increases

**Figure 5.** (a) The distributions of minimum REV sizes of porosity, sand density and  
tortuosity for Experiments-I-III ~~and H~~; (b) The frequency of minimum REV sizes of  
Experiments and fitted models

**Figure 6.** (a) The distributions of  $S_o$ -REV sizes during 0~1523 min for Experiments-I-III

and II; (b) The distributions of  $A_{OW}$ -REV sizes during 0~1523 min for Experiments-

I-III and II

**Figure 7.** (a) The mass center coordinate of PCE plume, GTP, plume area and the mean, standard deviation of  $S_o$ -REV and  $A_{OW}$ -REV during 0~1523 min~~The mass center coordinate of PCE plume and the change of average REV size as the distance  $d_l$ ,  $d_m$  increases;~~ (b) ~~The mean, standard deviation of  $S_o$ -REV and  $A_{OW}$ -REV during 0~1523 min~~The change of average REV size as the distance  $d_l$ ,  $d_m$  increases and fitted relationship between REV sizes and  $S_o$  for Experiments-I and II

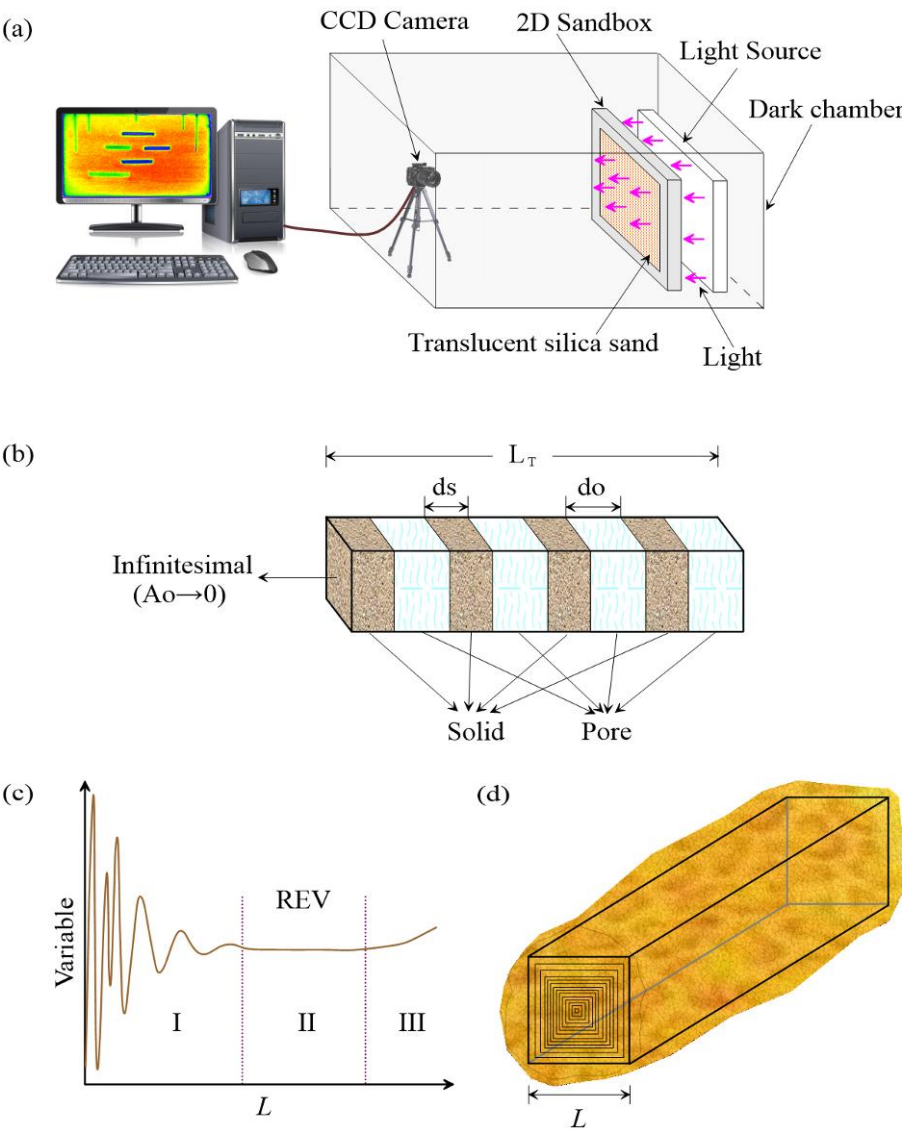

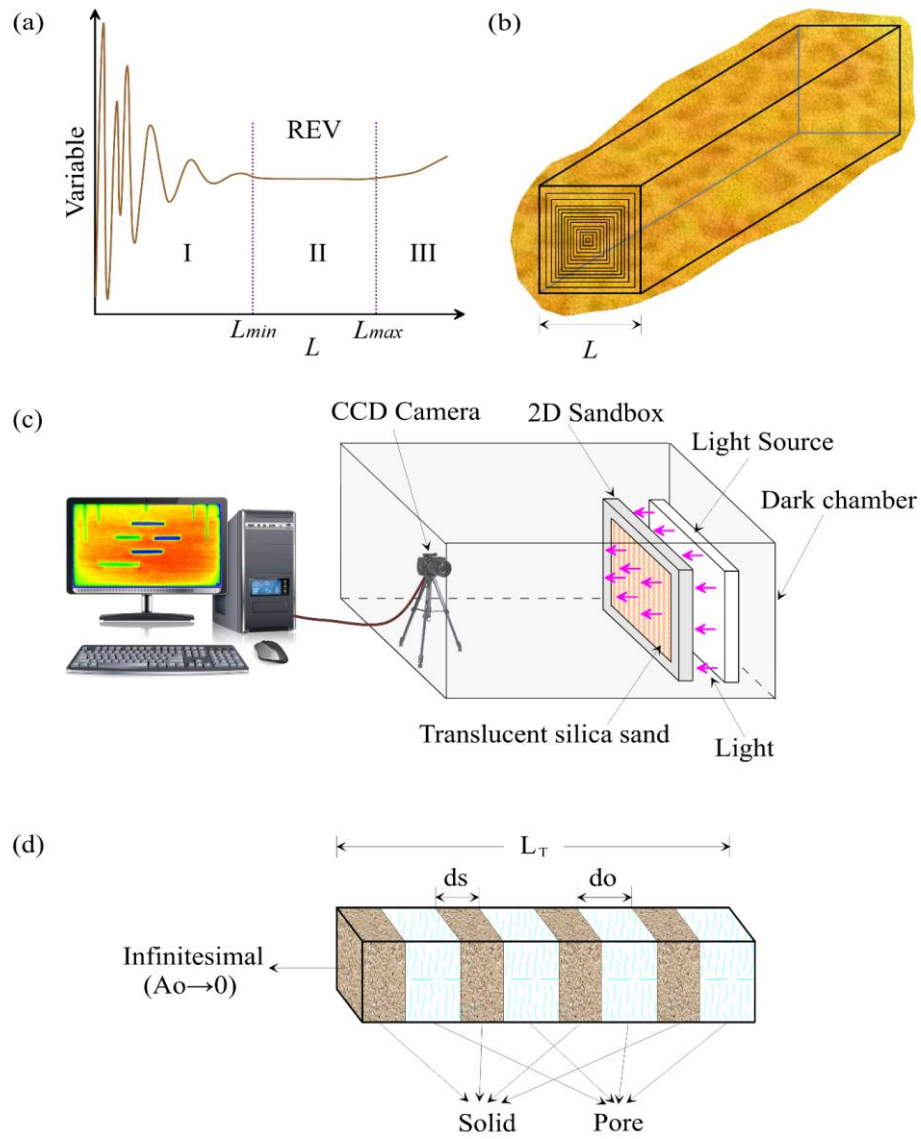



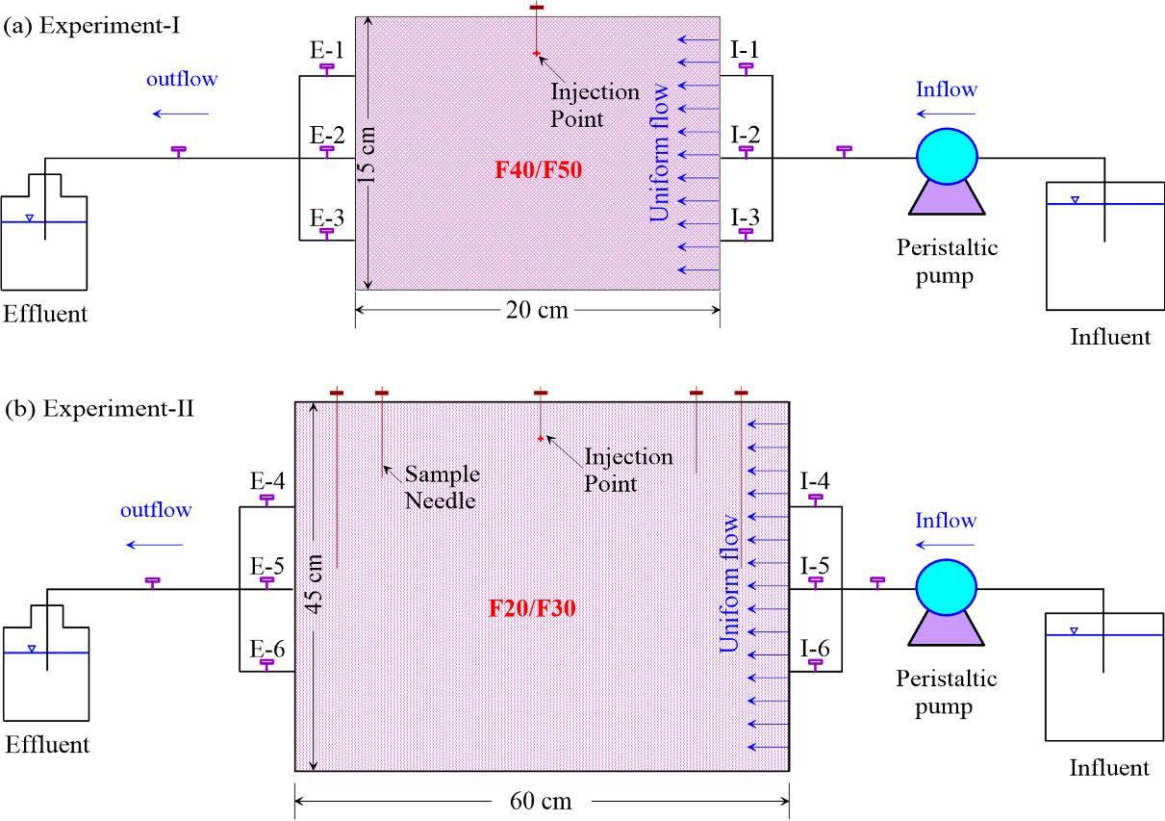

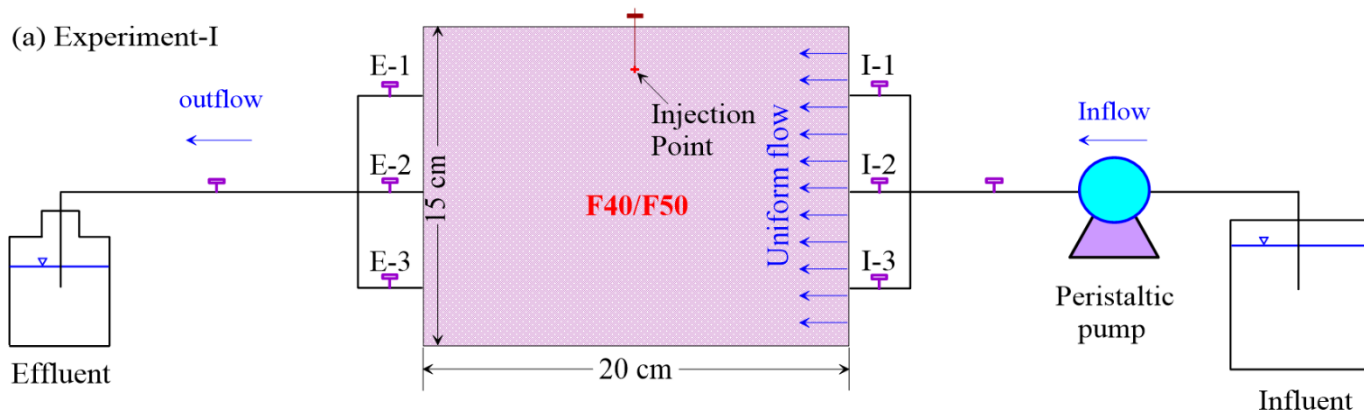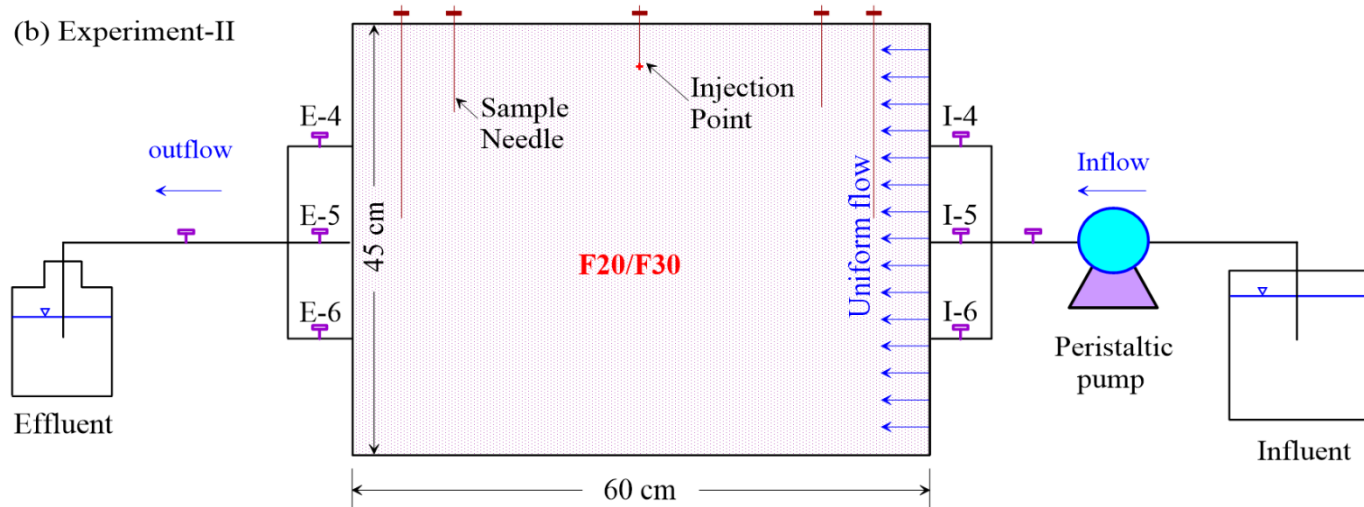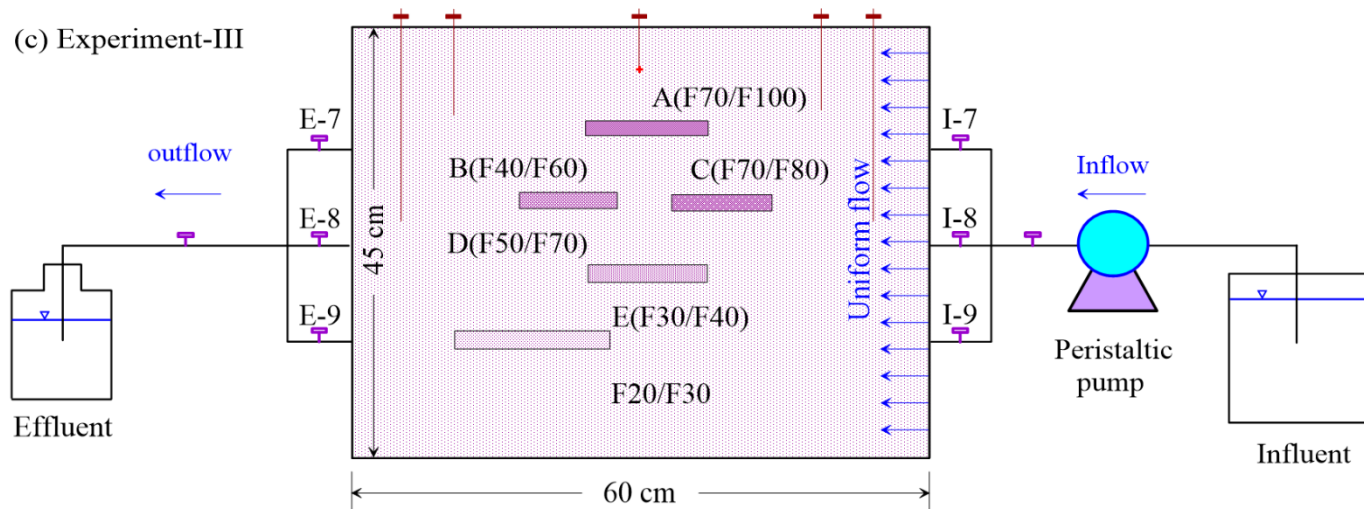

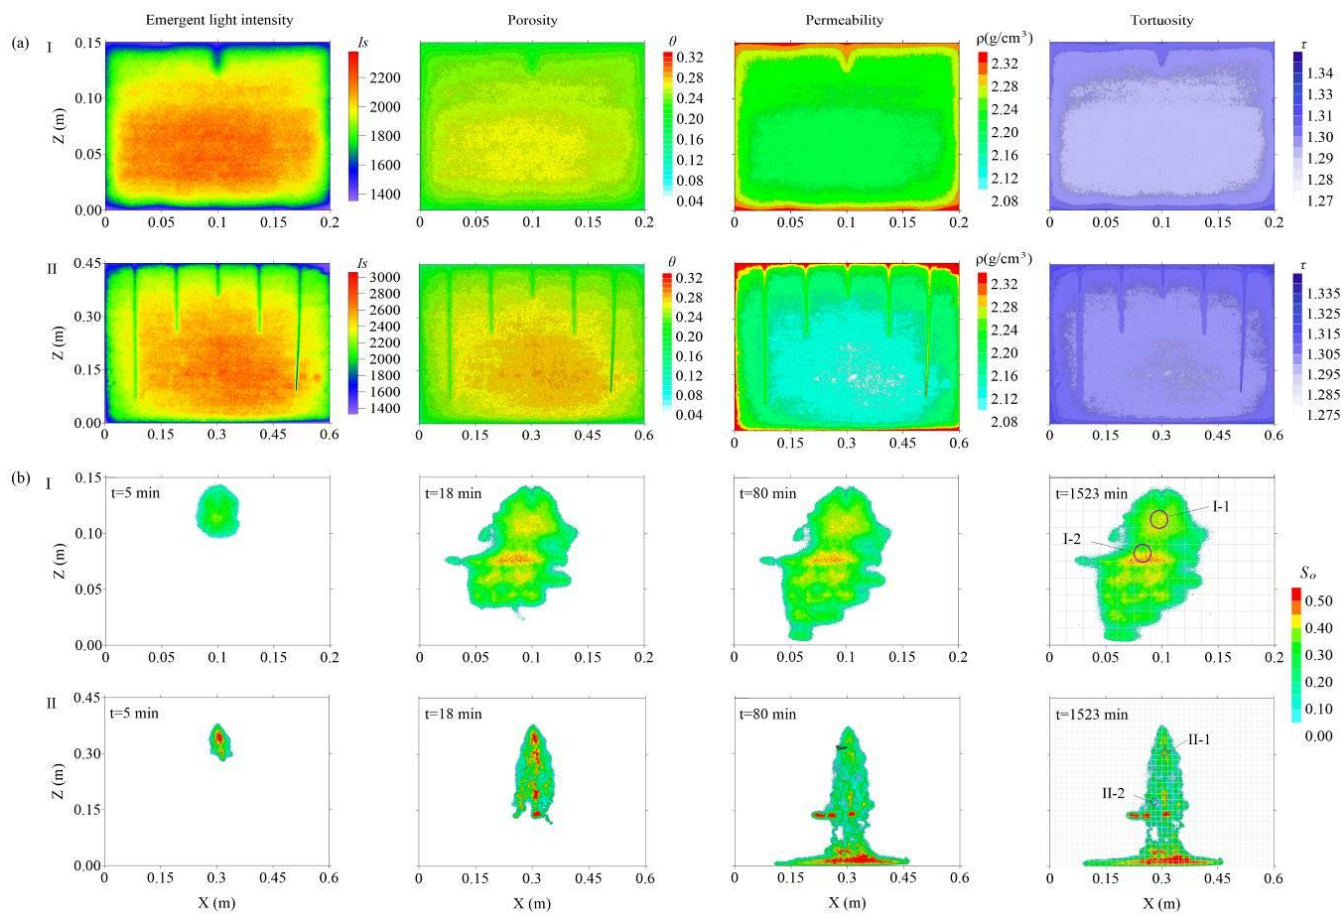



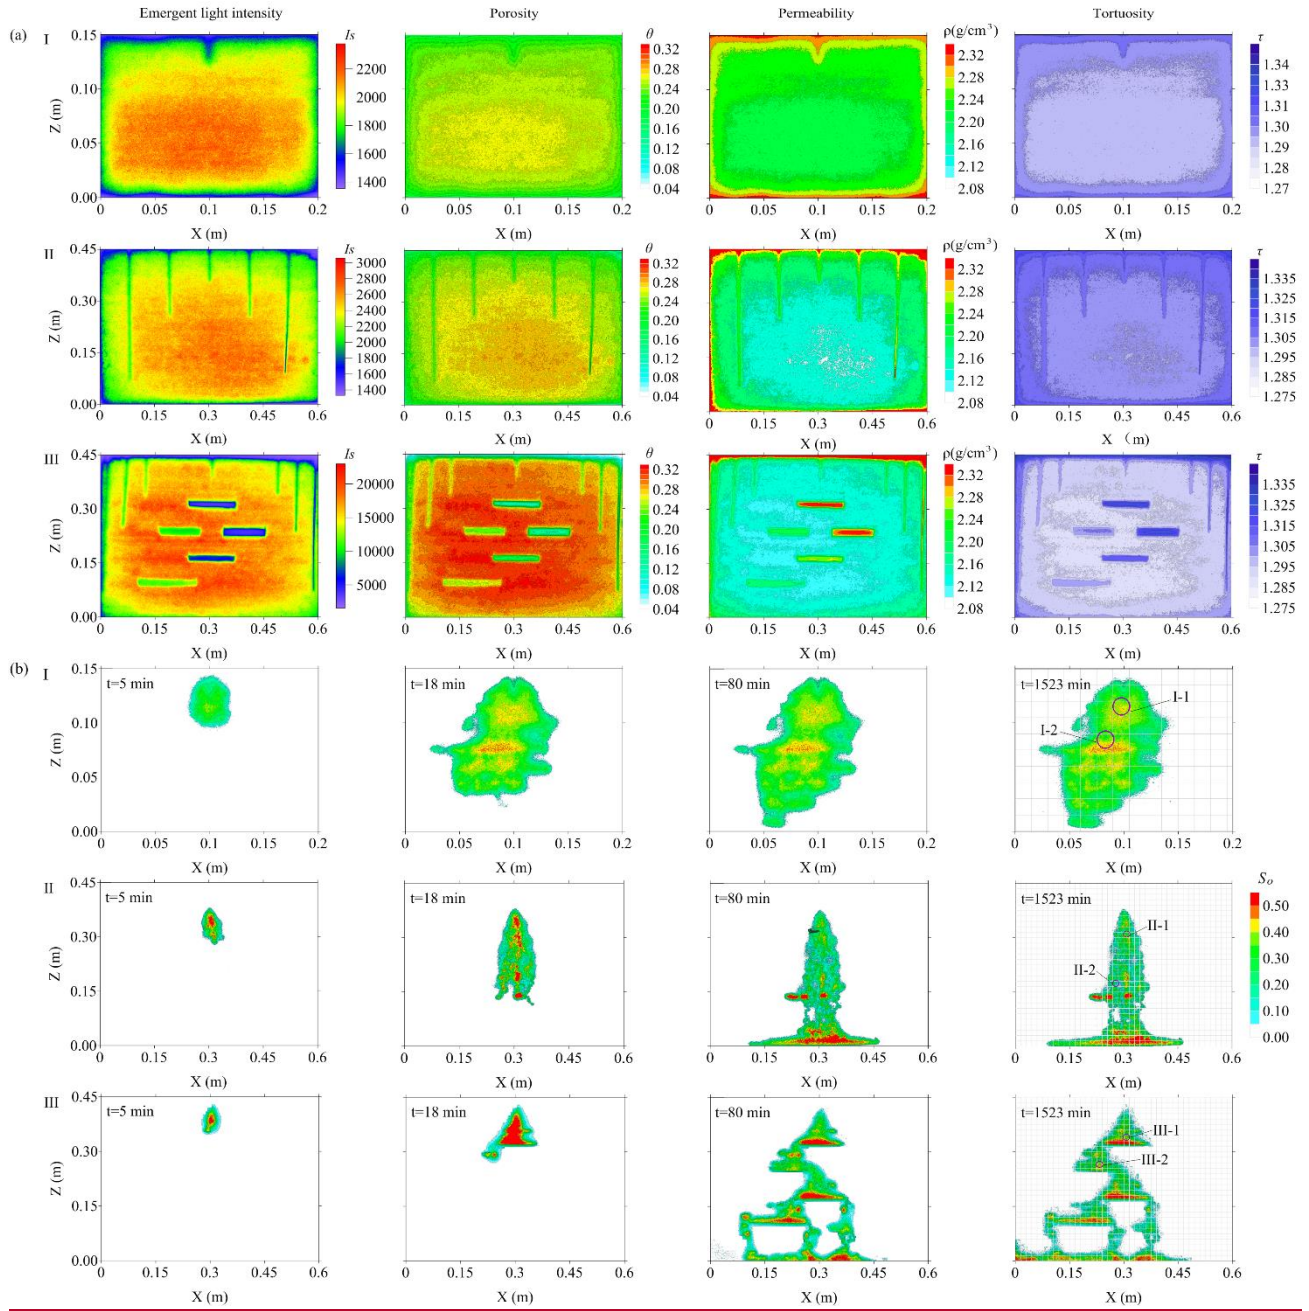

696 **Fig. 4**  
697

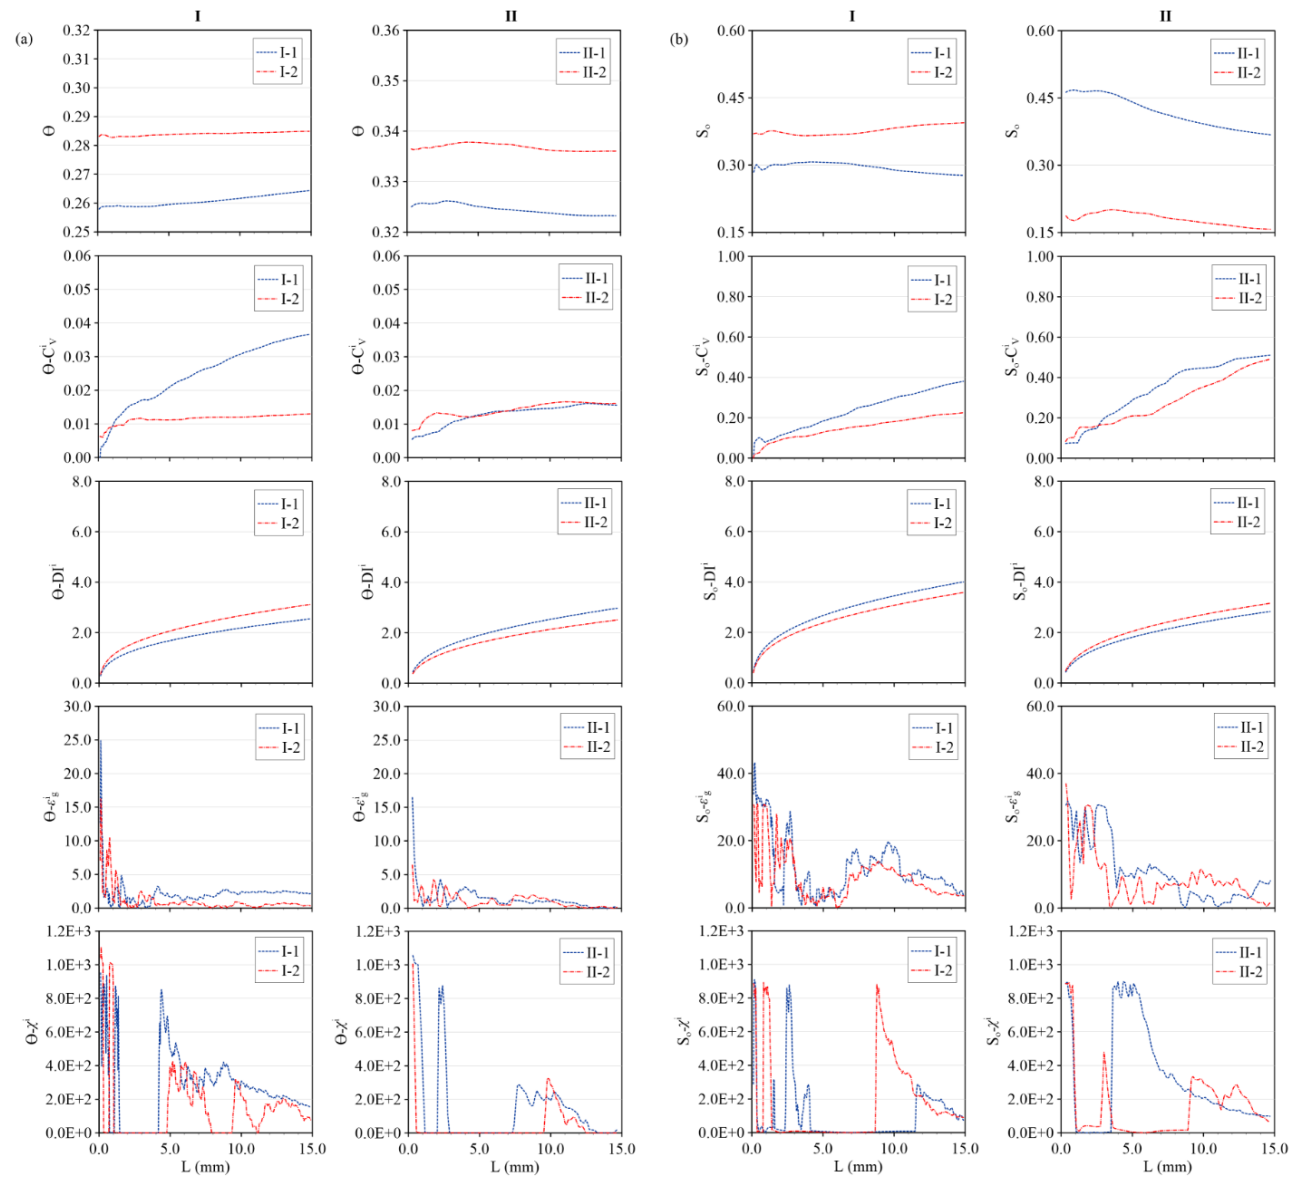

698  
699

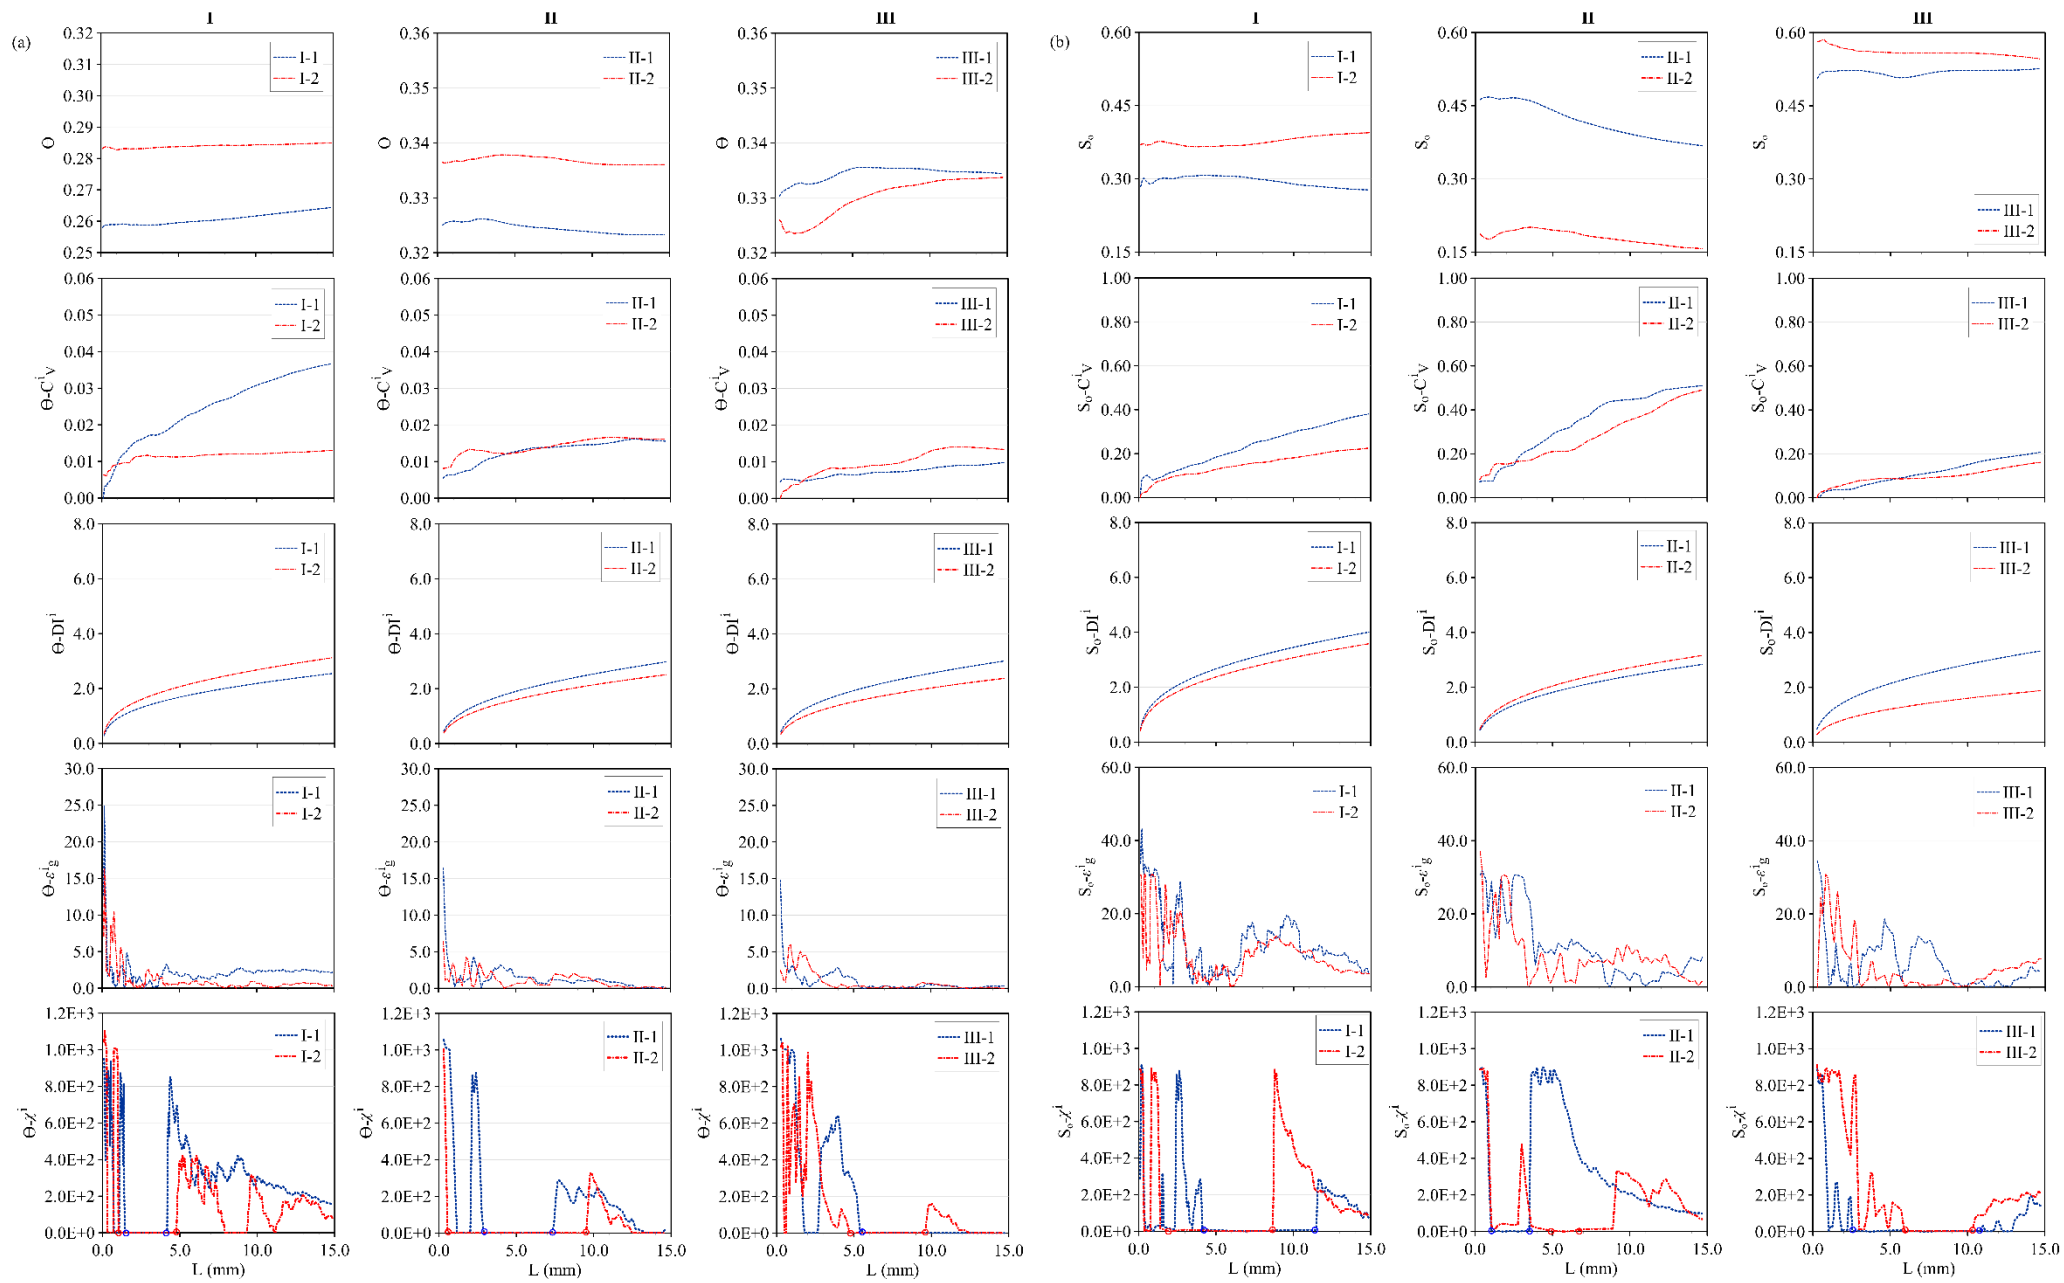

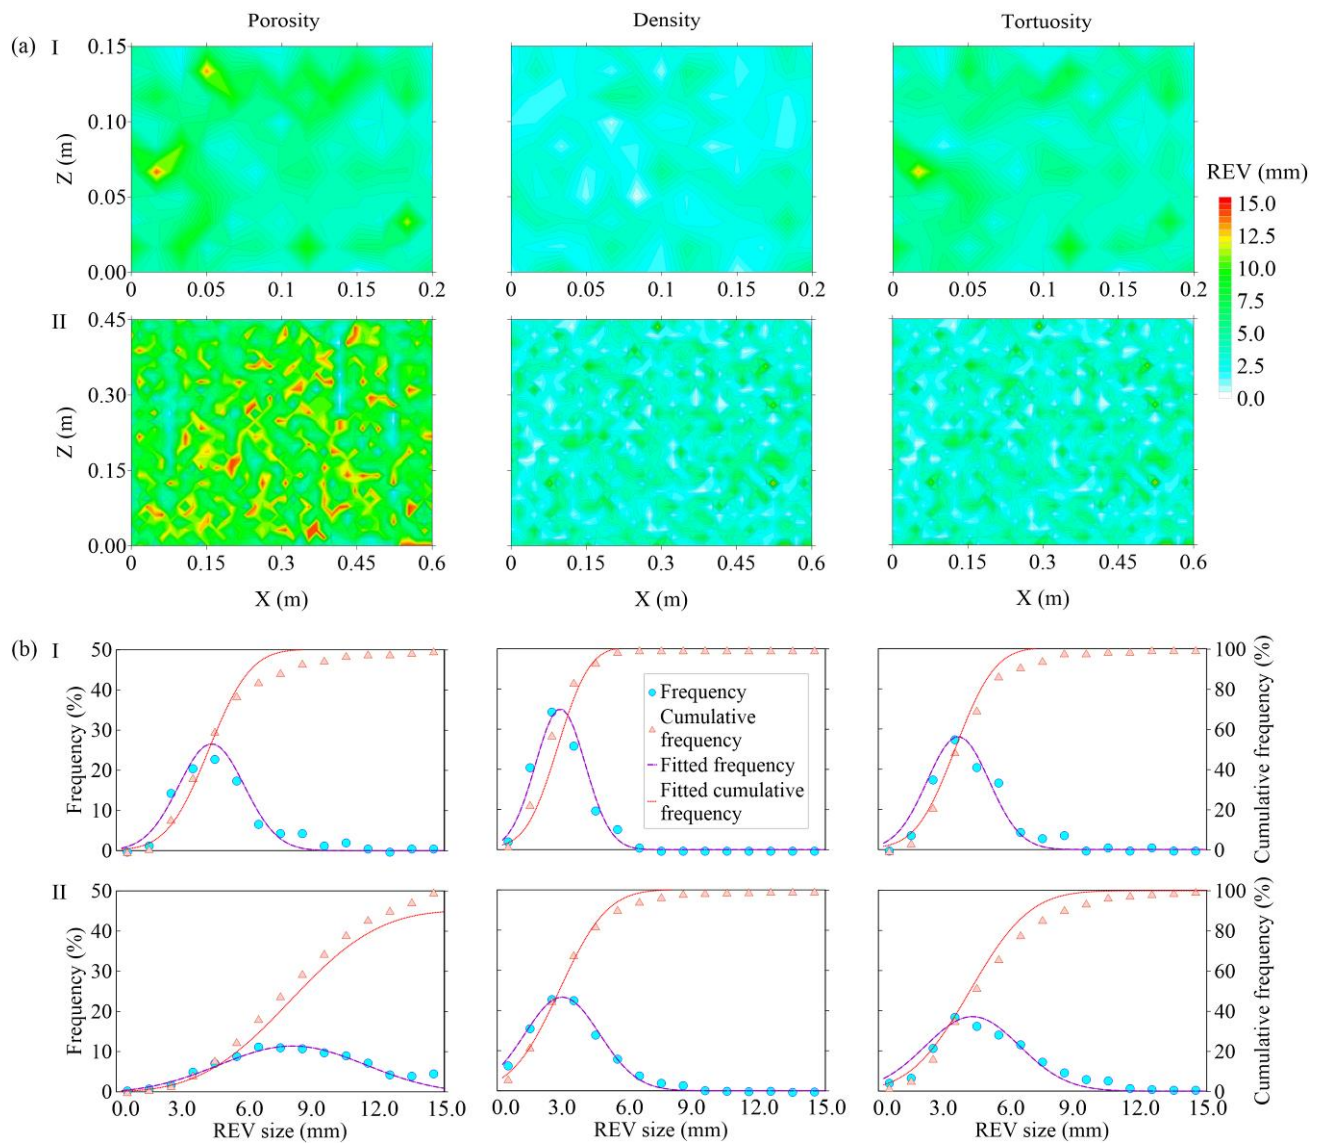



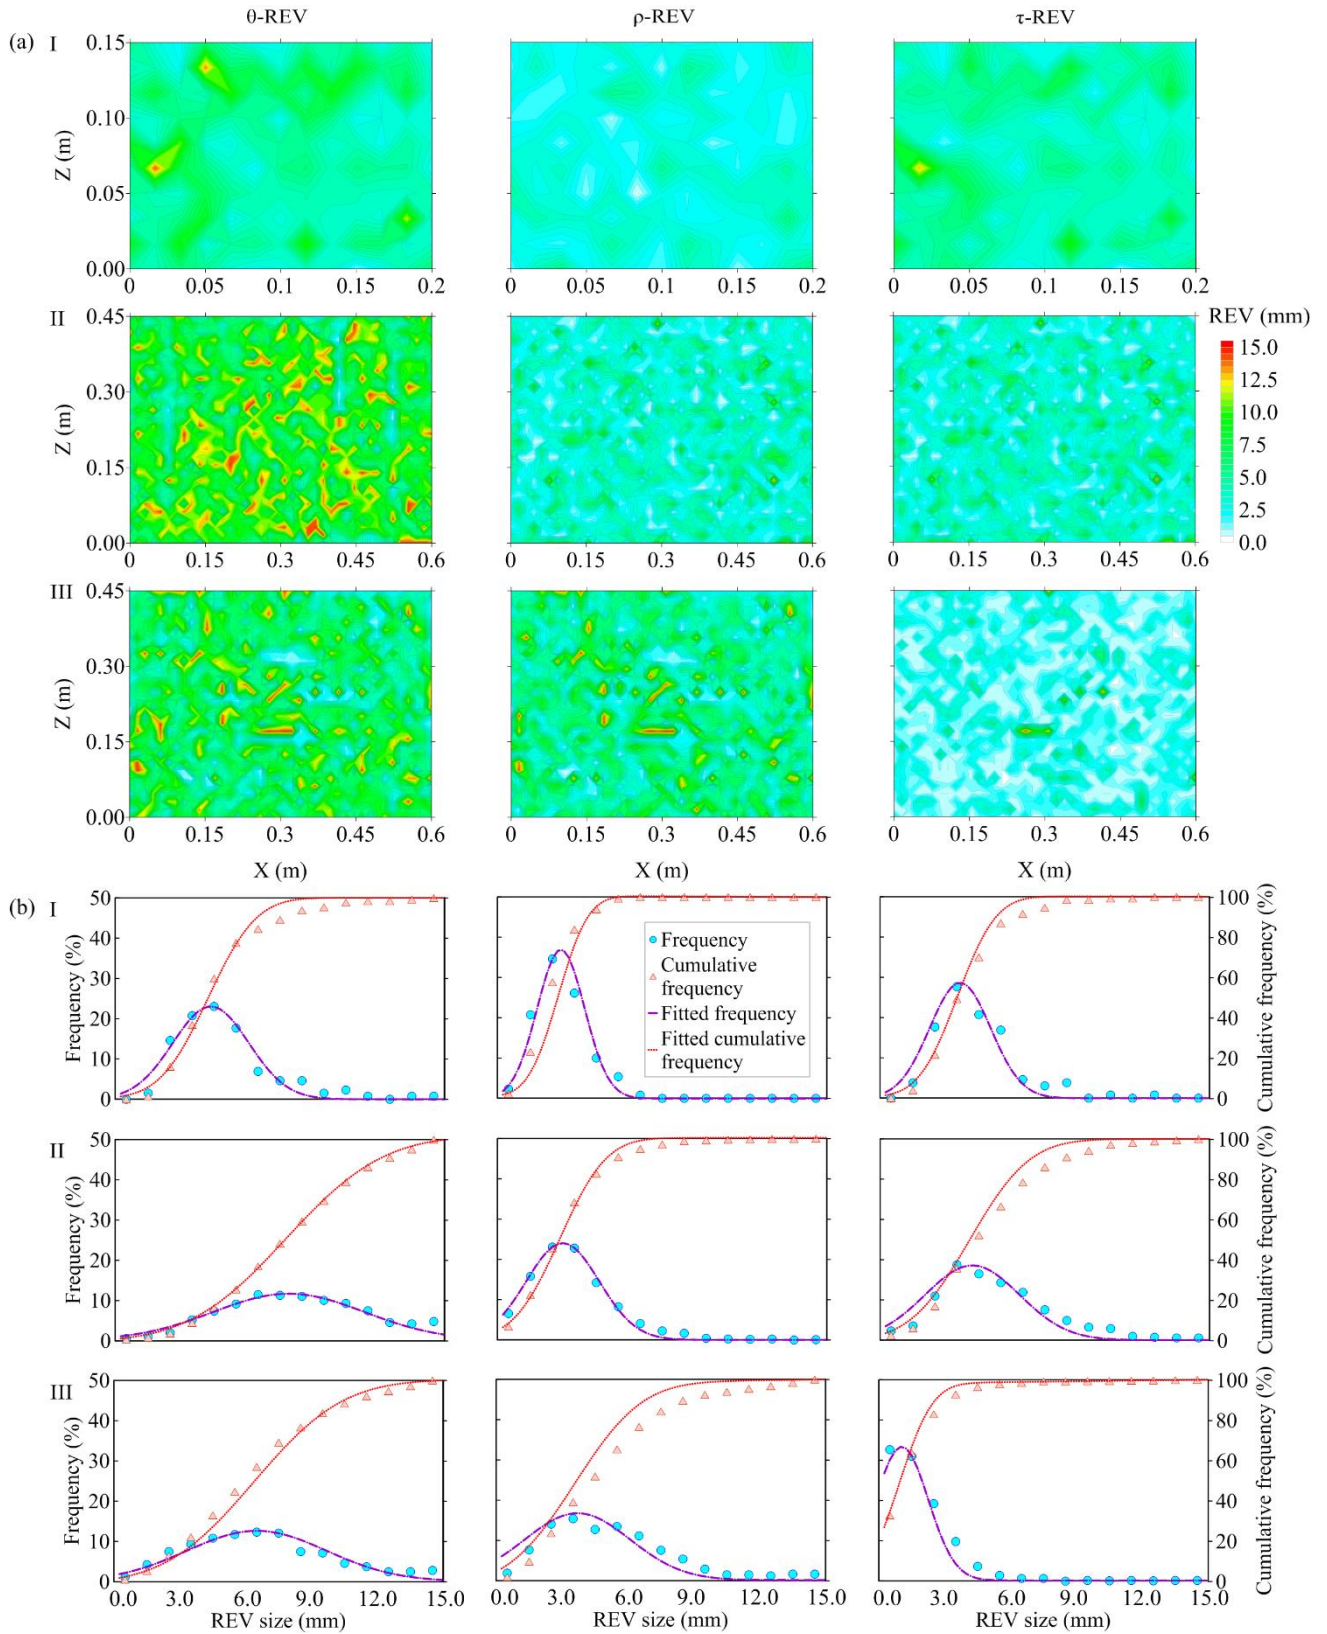



**Fig. 6**

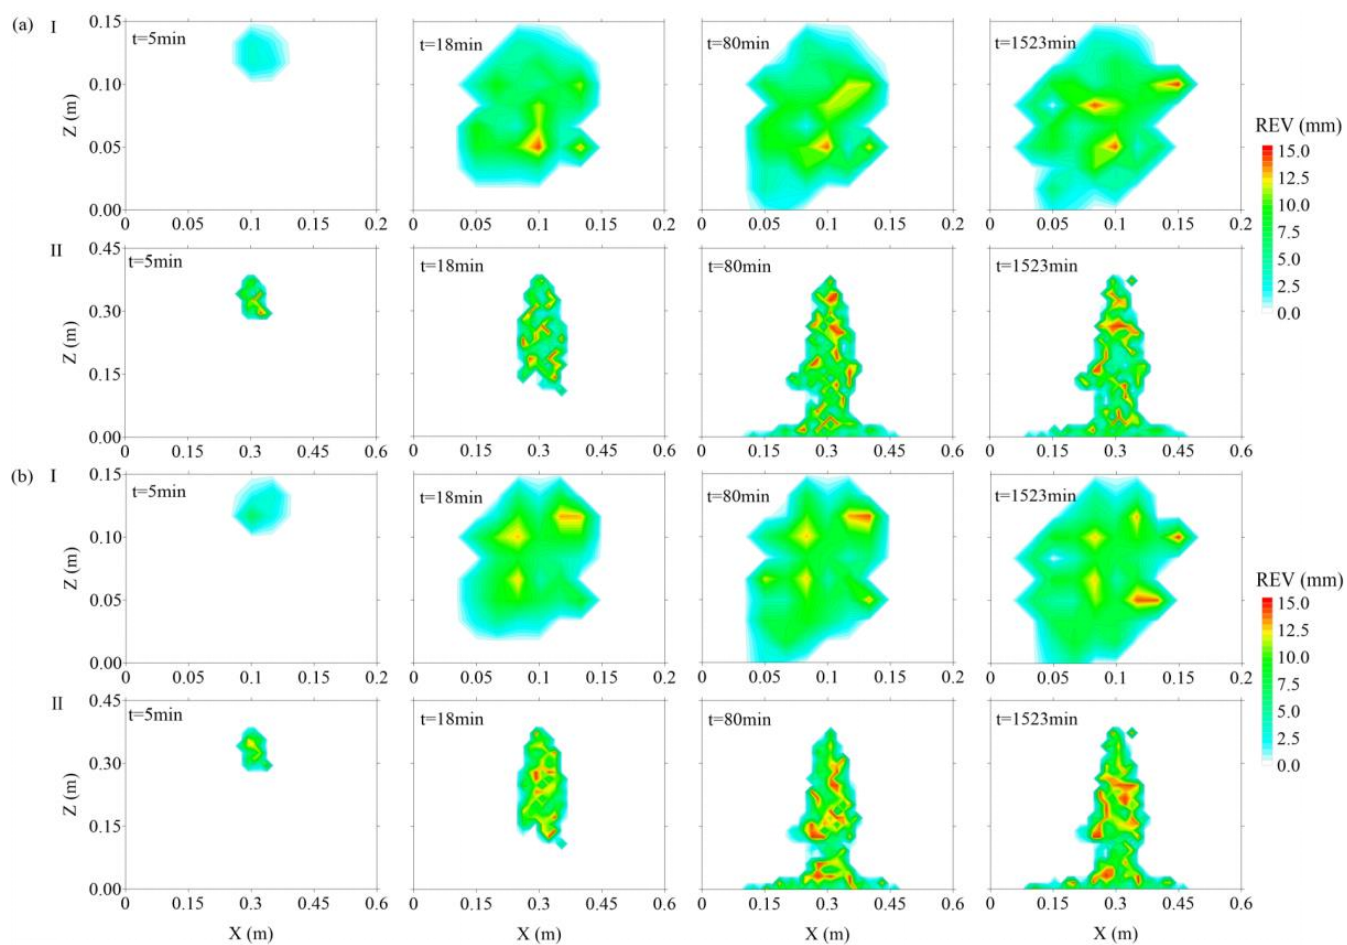

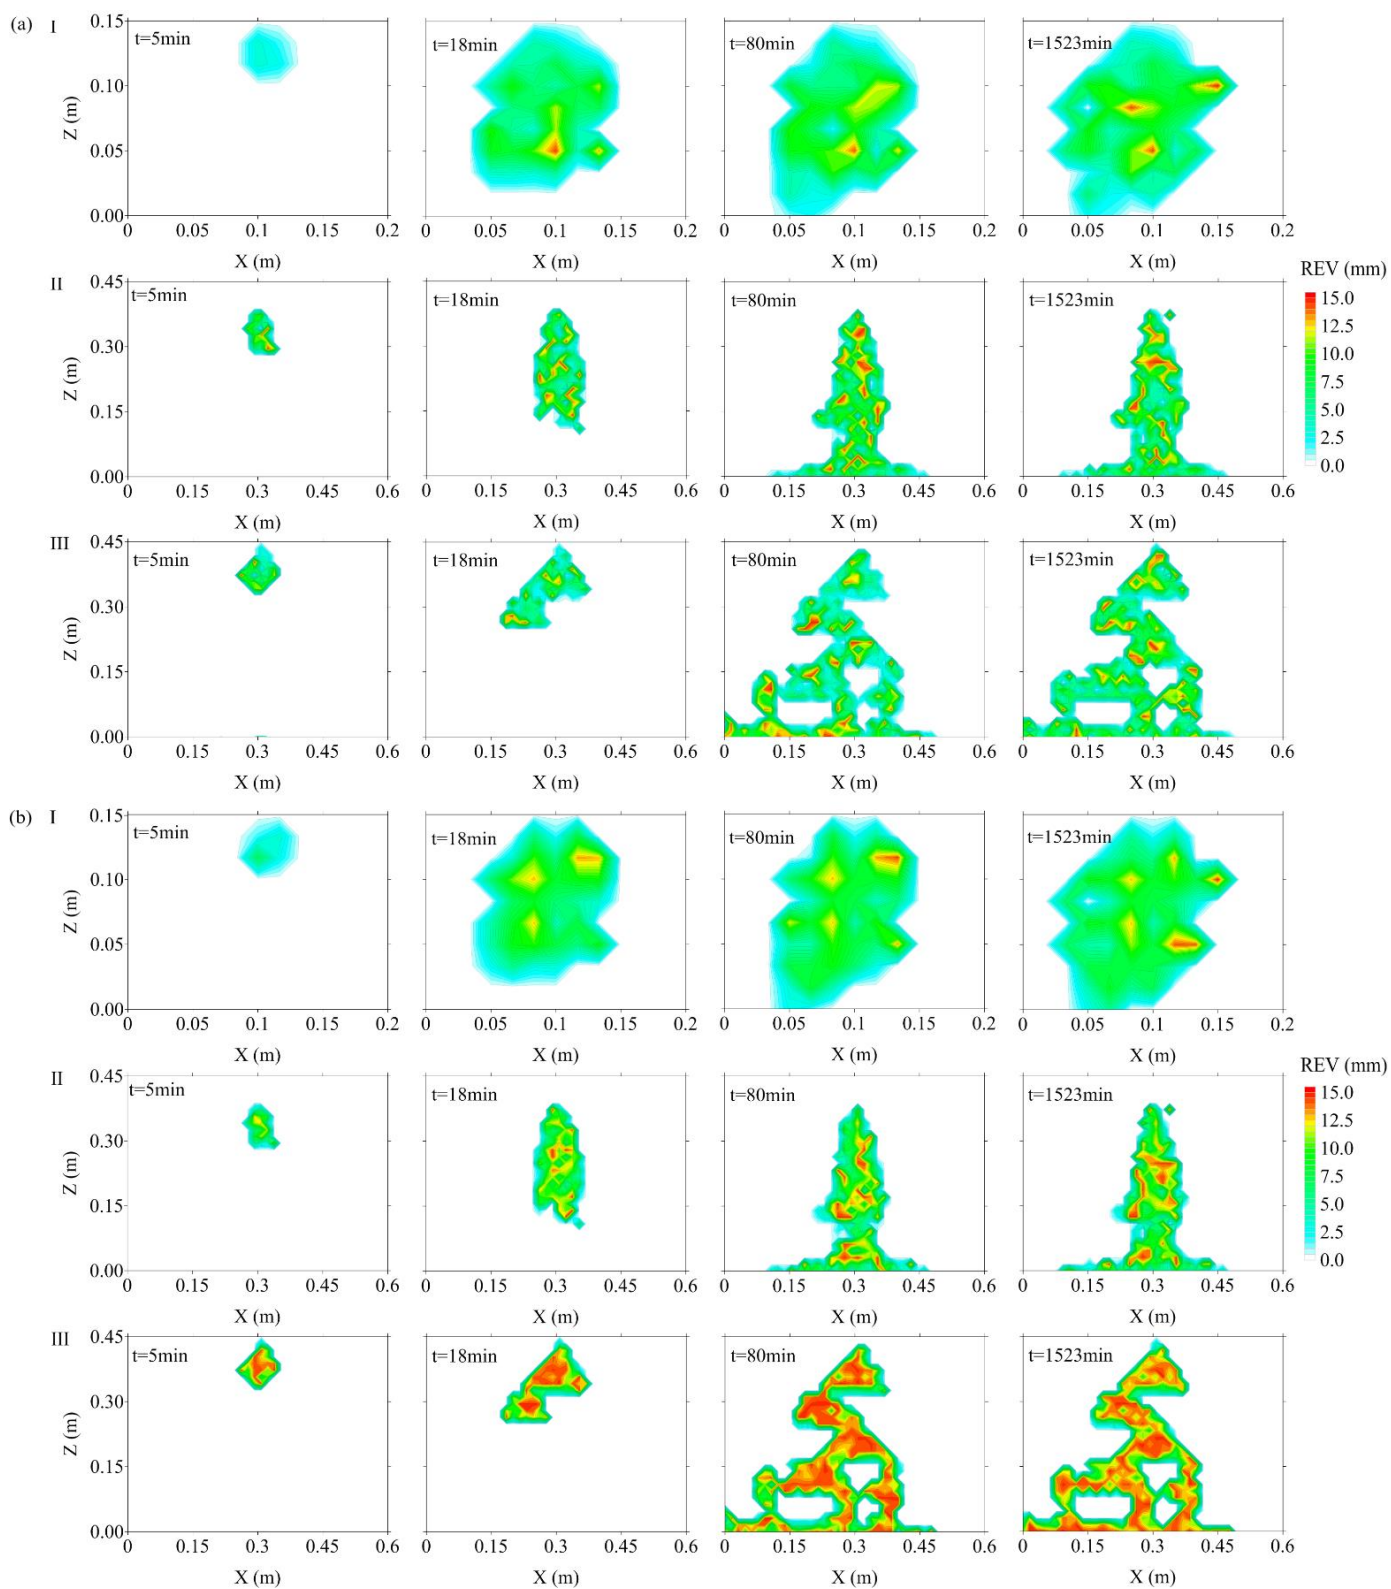

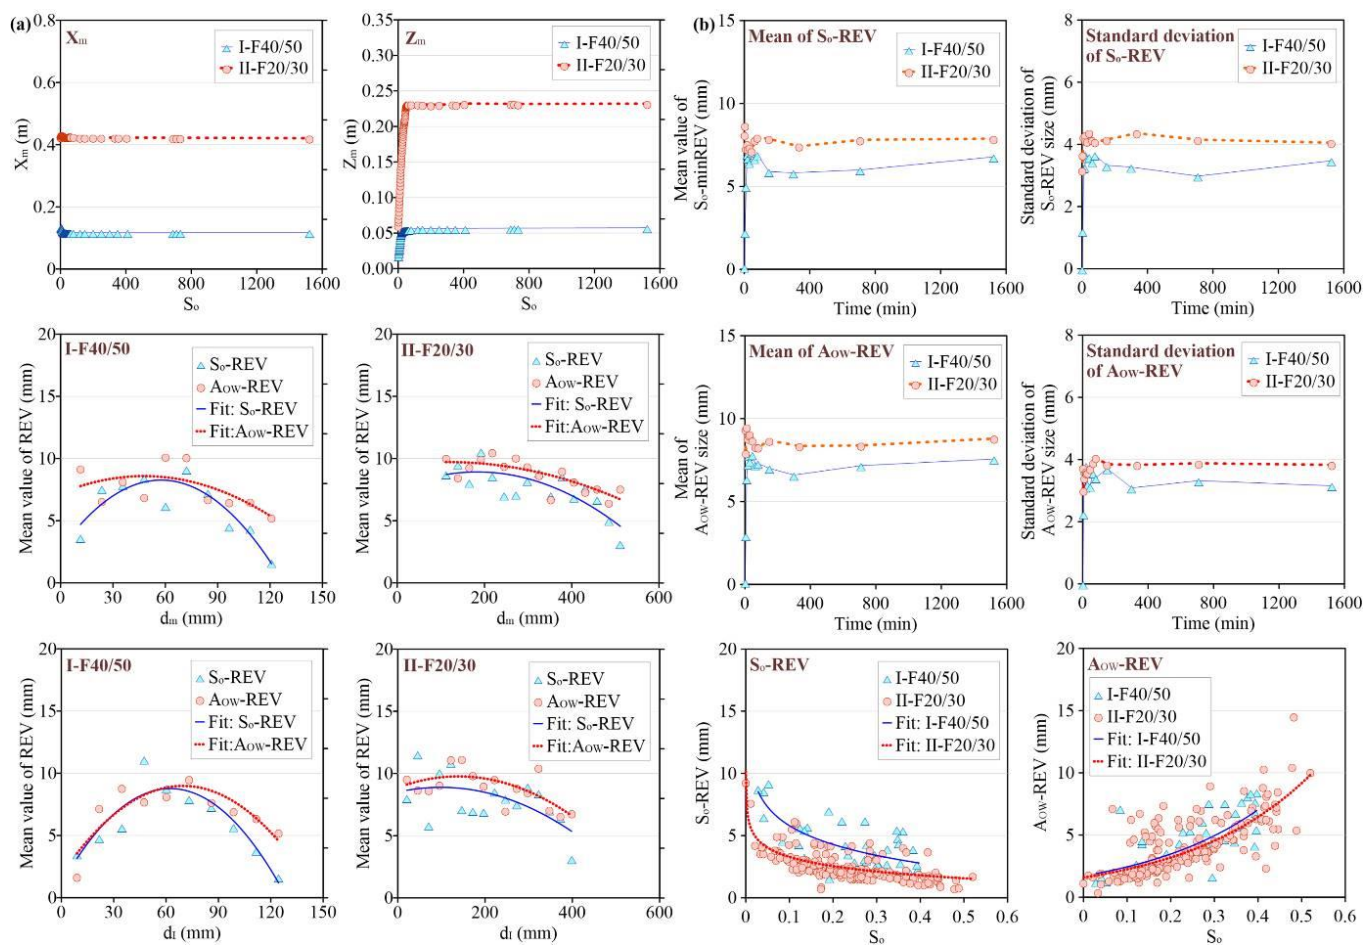

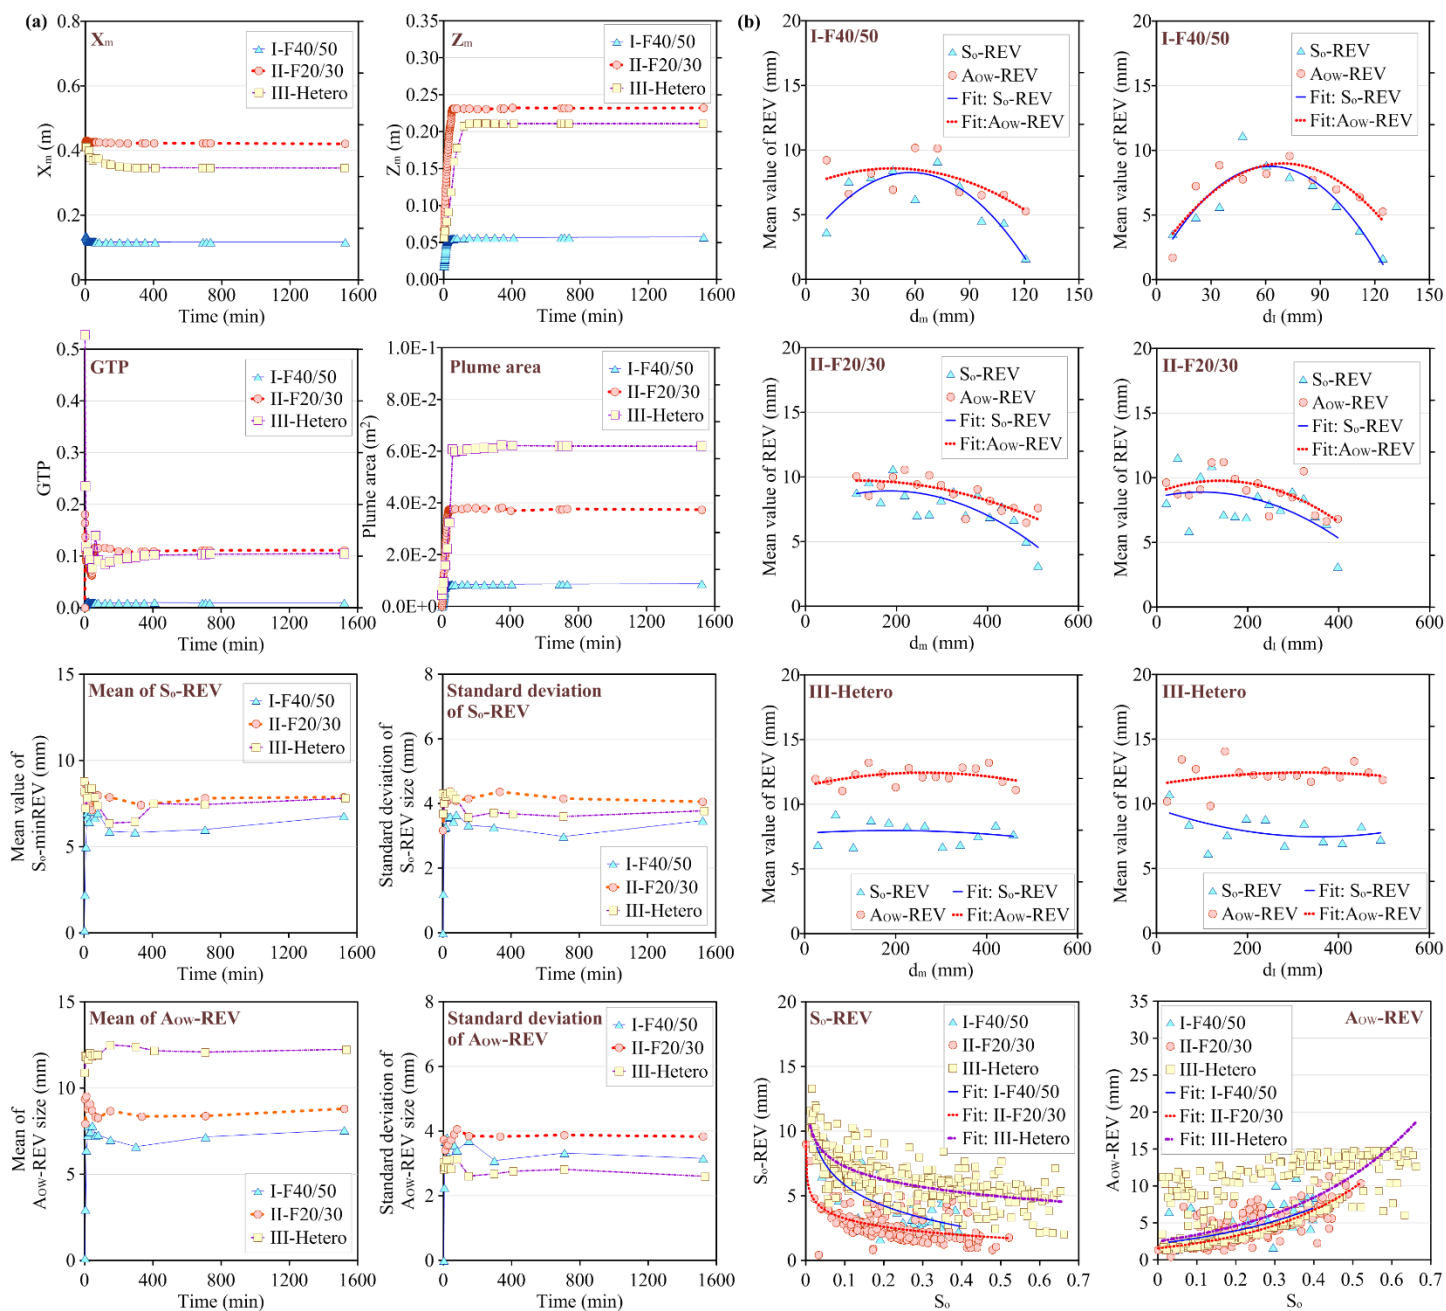

Supplement: Supplementary file [file hess-2020-91-AC1-supplement.zip]
