# Supplementary material for: A new criterion for determining the representative elementary volume of translucent porous media and inner contaminant
Source: Copernicus journal article supplement (doi:10.5194/hess-2020-91), 2020-05-20
Supplement: Supplementary file [file hess-2020-91-AC4-supplement.zip]

Response to [Referee #2's Comments](#) on Manuscript hess-2020-91 "A new criterion for determining the representative elementary volume of translucent porous media and inner contaminant" by Ming Wu, Jianfeng Wu, Jichun Wu, and Bill X. Hu

Note that the following text in [Arial Narrow font](#) denotes [Editor's and Reviewers' comments](#) and in Times New Roman font denotes our response to the comments in the review. In our resubmission, the marked PDF file ([Wu\\_et\\_al\\_R1\\_marked.pdf](#)) has clearly indicated all changes to the original manuscript. Also, in our marked PDF file, marked in ~~a green strikethrough font~~ is the text that should be removed from the original manuscript and marked in a red font is the text that has been added to the revision. In addition, Line number(s) mentioned below is referred to as that line numbering in the marked revised manuscript.

## **Response to Anonymous Referee #2's Comments:**

[Anonymous Referee #2](#)

[Received and published: 2 July 2020](#)

[This paper proposes a new criterion for identifying representative elementary volume \(REV\) of translucent silica sands. Two sandbox experiments were conducted to test the applicability of the proposed criterion. The authors stated that the proposed criterion is effective and reliable. However, there are some important issues in the current manuscript that should be resolved or addressed.](#)

**[Response]** Comments accepted. We appreciate Referee #2's positive comments. We have fully addressed the concerns raised by Referee #2's in the revised manuscript to improve the manuscript and given a point-to-point response to the reviewer's comments as below.

[Major comments:](#)

[1. The authors have published a series of paper on this topic. The research gap and the reason why a new criterion for REV is need should be clearly stated in the Introduction section.](#)

**[Response]** Comments accepted. We have added associated description into the Introduction section (Lines 90-93).

[2. Is the proposed criterion purely empirical or with some physical basis? If it is a criterion with physical basis, then the physical basis or the derivation process should also be added.](#)

**[Response]** Comments accepted. The new criterion conforms to the Eq. (12). Moreover, the new criterion is proposed based on the dimensionless range ( $\delta^i$ ) (Brown and Hsieh, 2000).

However,  $\delta^i \ll 1$  is hard to be achieved. According to the  $\frac{\partial Y(L_i)}{\partial L}|_{L_i=L_o}=0$  [Eq. (12)], we propose a new criterion  $\chi^i = \frac{|\delta^{i+1} - \delta^{i-1}|}{\delta^i \Delta L}$  and test the effect for translucent porous media.

3. The blue curve of II-1 in the last figure of Fig. 4 is totally different from other curves.

For other curves, the blue line becomes zero when the red line is zero. But for this figure, the blue line has a very big peak when the red line becomes zero. So the results of this figure are totally different from other figures. Such results seem does not support the authors' conclusion that "...is more convenient and reliable than other methods for REV estimation" in Lines 315-316.

**[Response]** Comments accepted. Referee #2 may refer to the  $S_o-\chi^i$  of II-1. The blue line becomes zero when  $L < 5.0\text{mm}$ , suggest the REV size of  $S_o$  for II-1 has small value compared to II-2. In the last figure of Fig. 4, the blue line first becomes zero when red line has large value. As scale increases, the red line becomes zero while the blue line has large value again. The phenomenon suggests the  $S_o$ -REV's of II-1 and II-2 have different values. By the help of the new criterion, REV estimation is more convenient. To make zero part of blue line more apparent, the blue line is thickened in the last figure of Fig. 4. We have used open circles to indicate the REV plateau region in Fig. 4. Readers can see REV plateau estimated by the new criterion. (Lines 697-700)

4. The authors stated that "All observation cells show similar variation curves of ... that low value intervals are quite apparent, indicating that ... is vary effective to make the REV plateau obvious...", but it is not the case for the last figure in Figure 4b. As very different curves are obtained for Experiments I and II, it should be doubted that whether the new criterion is effective or not. Although the REV plateau may be identified based on the other figures in this study, but it is possibly that the REV plateau cannot easily be identified in other similar studies or in real porous materials.

**[Response]** Comments accepted. Curves all have low value intervals in Fig. 4 for  $S_o-\chi^i$ , so we treat these curves as similar variation curves. In the last figure in Fig. 4b, the low value interval of blue line is not apparent, so the blue line is thickened to make the low value interval apparent. (Lines 697-700)

5. The fit to cumulative frequency in Figure 5b is not very good. Both underestimation and overestimation exist.

**[Response]** Comments accepted. We have made effect to improve the fit to cumulative frequency in Fig. 5b (Lines 703-705).

6. Can the proposed criterion be applied to real world porous materials? Is the proposed criterion only applicable to the translucent silica sand used in this manuscript?

The authors stated that fluid migration and transformation in porous media can be accurately simulated

using the light transmission technique and the proposed criterion.

Should the proposed criterion be used with the light transmission technique simultaneously?

If yes, then the applicability of the proposed criterion is restricted to a very narrow range.

**[Response]** Comments accepted. We appreciate the reviewer's insightful comment. In this study, we only focus on characterizing the REV of translucent silica sand and inner PCE plume at lab scale based on light transmission technique. Due to multiple limitations of x-ray and gamma ray causing high cost, inefficiency, complex high energy sources and hazard environment in materials measurements, light transmission technique is used to achieve rapid, hand and economical measurements of materials with high resolution and good effectiveness. However, minimum REV size ( $L_{\min}$ ) and maximum REV size ( $L_{\max}$ ) can't be identified simultaneously for translucent silica sand based on previous criteria and light transmission technique. So this new criterion is proposed to improve the effect of REV estimation for translucent silica sand. In this study, the proposed criterion is used with the light transmission technique. However, we believe its potential applicability can't be treated as a narrow range by this study. We think this issue is beyond this study and the applicability of the new criterion will be explored in our further work.

Minor comments:

1. Line 51: The authors used  $n$  to represent porosity, but then they used to represent porosity in Line 145. The authors again used  $n$  to represent porosity in Line 148 Equation (5).

**[Response]** Comments accepted. We have replaced ' $n$ ' with ' $\theta$ ' (Lines 53 and 158).

2. Line 127: What are the variation ranges of  $i$  and  $j$  in Equation (1)? They should be added to the equation.

**[Response]** Comments accepted. We have used  $a$  and  $b$  in Eq.(1) to represent phase number and interface number (Lines 136-138).

3. Line 134: Add references to Equation (2)

**[Response]** Comments accepted. We have added references to Equation (2) (Lines 143-144).

4. Line 142: Add references to Equations (3) and (4)

**[Response]** Comments accepted. We have added reference to Equations (3) and (4) (Line 152).

5. Line 149: The quantity  $L_s$  seems not defined

**[Response]** Comments accepted. We have checked carefully and made correction (Line 159).

6. Line 169: Is the "Hsies" should be "Hsieh"?

**[Response]** Comments accepted and correction made (Line 205).

7. Lines 175-176: Reputation: "the derivative... will tend to zero"

**[Response]** Comments accepted. We have deleted “the derivative... will tend to zero” (Lines 211-212).

8. Lines 176-177: References should be added to this sentence.

**[Response]** Comments accepted. We have added references (Line 214-215).

9. Line 182: Cannot find  $i$  in Figure 1b

**[Response]** Comments accepted. The cuboid window is presented in Fig. 1b,  $i$  refers to the window increment number. We have modified the numbers of figures in Fig. 1 (Lines 653-659, 683-685).

10. Line 194: Here is , in Equation (11) is , which one is correct?

**[Response]** Comments accepted. The cuboid window is presented in Fig. 1b,  $i$  refers to the window increment number.  $m(i)$  is the total number of sub-grids in measured cuboid window.

11. Lines 217-218: The authors should carefully check whether  $i$  should be in subscript or superscript.

**[Response]** Comments accepted. We have corrected the sub  $i$  to sup  $i$  (Line 256).

12. Lines 218-220: Double check whether or should be used.

**[Response]** Comments accepted. We have checked carefully and corrected the subscripts and superscripts (Line 256).

13. Line 238: Cannot find  $t=1.44$  min in Figure 3b.

**[Response]** Comments accepted. We have corrected this mistake (Line 278).

14. Lines 239-240: There should be error in this sentence or grammatical error

**[Response]** Comments accepted. We have revised this sentence (Lines 278-280).

15. Line 243: There is no Fig. 2c

**[Response]** Comments accepted. We have deleted “Fig. 2c” (Line 180).

16. Line 253: Should be "Figs. 4a and b"

**[Response]** Comments accepted. We have made correction (Line 293).

17. Line 269: There is no Fig. 4f, only Fig. 4a and 4b in this figure.

**[Response]** Comments accepted. We have replaced “Figs. 4a-f” to “Figs. 4a and b” (Line 310).

18. Line 338: Use a different symbol in Equation (16), because has already been used in Equation (15).

**[Response]** Comments accepted. We have used a different symbol (Lines 377-378).

19. Line 358 and 359: Both are Experiment II?

**[Response]** Comments accepted. All mean REV sizes of these variables for Experiment-II are larger than REVs of Experiments-I. We have made corresponding correction (Line 402).

20. Line 618: The subscripts and superscripts in the axis titles of Figure 4 can not be clearly seen

**[Response]** Comments accepted. We have revised Figure 4 to make subscripts and superscripts clearer (Lines 697-700).

21. The equations listed in Table 2 are already included in the main text as Equations (10), (11), (14), and (15). Table 2 should be deleted. Also delete the citations and descriptions on Table 2.

**[Response]** Comments accepted. We have deleted Table and associated citations and descriptions (Lines 627-628).

22. I would suggest the authors modifying the numbers of figures and make sure the figure numbers appear in order in the text. For example, the authors first cited Fig. 1c in Line 52 and then Fig. 1a in Line 96 and Fig. 1b in Line 140. Generally, we should first cite Fig. 1a, then Fig. 1b, and then Fig. 1c in order.

**[Response]** Comments accepted. We have modified the numbers of figures in Fig. 1 (Lines 653-659, 683-685).

23. Table 3: Delete the equations and just list the parameter values.

**[Response]** Comments accepted. We have deleted the equations and list parameter values in Table 2 (Lines 630-634).
